# Supplementary material for: Quantification of substituent effects using molecular electrostatic potentials: additive nature and proximity effects
Source: Royal Society of Chemistry journal article supplement (doi:10.1039/b9nj00333a), 2009-01-01
Supplement: b9nj00333a.pdf [file b9nj00333a.pdf]

## Quantification of substituent effects using molecular electrostatic potentials: additive nature and proximity effects

Fareed Bhasha Sayyed and Cherumuttathu H. Suresh\*

*Computational Modelling and Simulation Section, National Institute for  
Interdisciplinary Science and Technology (CSIR), Trivandrum, India 695 019.*

*E-mail: sureshch@gmail.com*

### Table of Contents

|                                                                                                                    |     |
|--------------------------------------------------------------------------------------------------------------------|-----|
| <b>Fig. S1</b> Dependence of $V_{\min}$ with $\phi$ in the unsubstituted benzoic acid.....                         | S2  |
| <b>Table S1</b> $\phi$ (in degrees) and $V_{\phi}$ (kcal/mol) are reported by modelling the free benzoic acid..... | S3  |
| <b>Fig. S2</b> Plot of $E_S[\rho(r)]$ vs $V_{PE}$ and Plot of $V_o^E$ with polar effect parameters.....            | S4  |
| <b>Fig. S3</b> Linear plots of electronic effects of ortho, meta and para substituent effects.....                 | S5  |
| <b>Table S2</b> B3LYP/6-31G(d,p) optimized geometry of benzoic acid.....                                           | S6  |
| <b>Table S3</b> B3LYP/6-31G(d,p) optimized geometries of ortho substituted benzoic acids.....                      | S7  |
| <b>Table S4</b> B3LYP/6-31G(d,p) optimized geometries of meta substituted benzoic acids.....                       | S12 |
| <b>Table S5</b> B3LYP/6-31G(d,p) optimized geometries of para substituted benzoic acids.....                       | S17 |

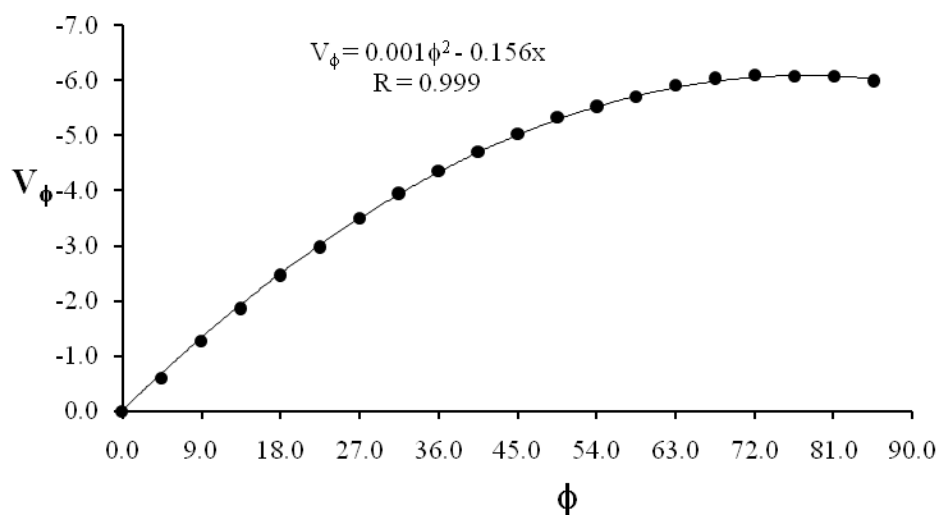

**Fig. S1** Dependence of  $V_\phi$  with  $\phi$  in the unsubstituted benzoic acid.

**Table S1**  $\phi$  (in degrees) and  $V_\phi$  (kcal/mol) are reported by modelling the free benzoic acid.

| $\phi$ | $V_\phi^a$ |
|--------|------------|
| 0.0    | 0.00       |
| 4.5    | -0.59      |
| 9.0    | -1.27      |
| 13.5   | -1.86      |
| 18.0   | -2.46      |
| 22.5   | -2.97      |
| 27.0   | -3.50      |
| 31.5   | -3.95      |
| 36.0   | -4.35      |
| 40.5   | -4.69      |
| 45.0   | -5.02      |
| 49.5   | -5.33      |
| 54.0   | -5.52      |
| 58.5   | -5.69      |
| 63.0   | -5.90      |
| 67.5   | -6.03      |
| 72.0   | -6.08      |
| 76.5   | -6.07      |
| 81.0   | -6.07      |
| 85.5   | -5.98      |
| 90.0   | -6.04      |

<sup>a</sup>  $V_\phi = -24.08$  kcal/mol for  $\phi = 0$

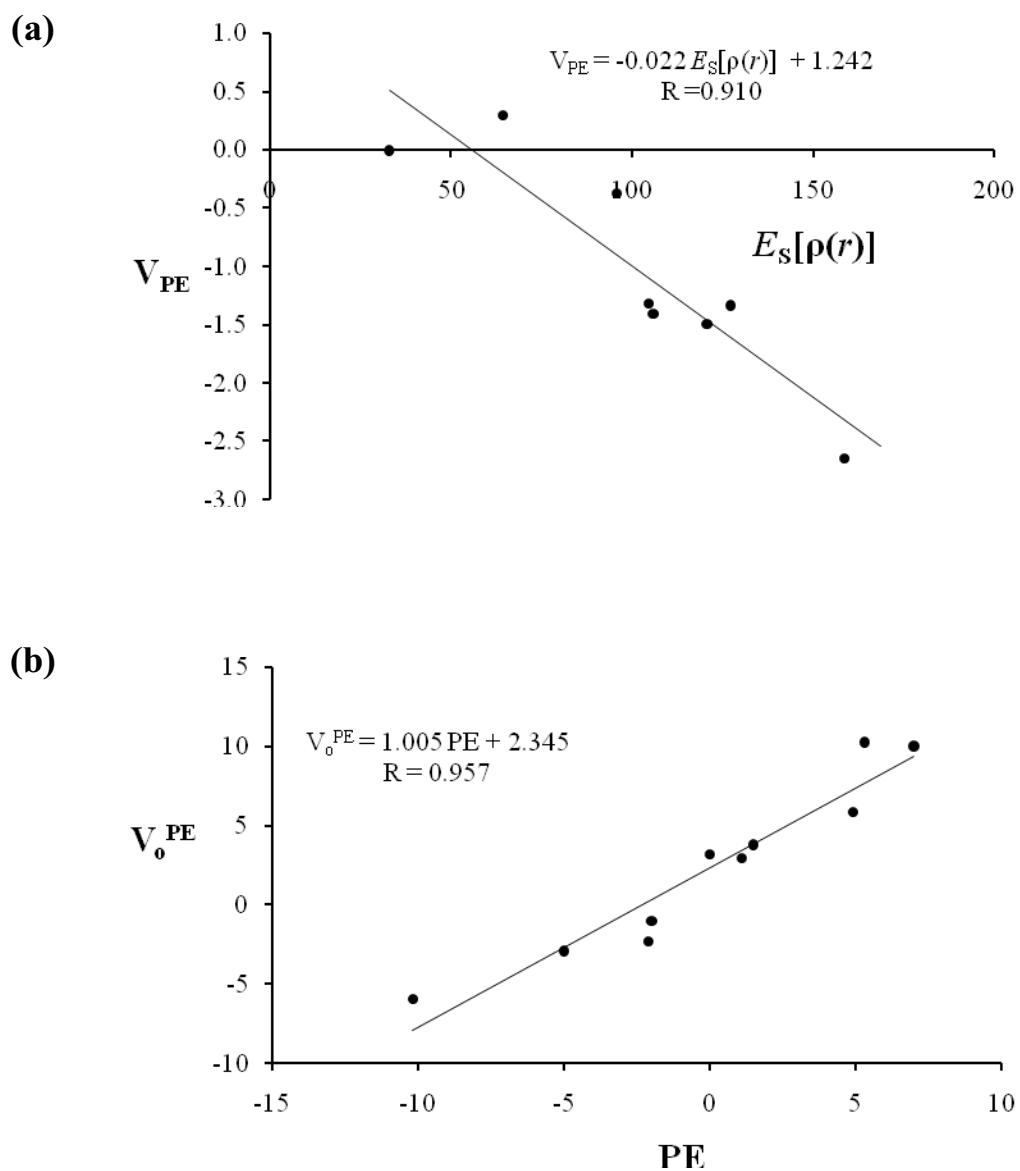

**Fig. S2** (a) Plot of  $E_S[\rho(r)]$  vs  $V_{PE}$  [the hydrogen bonded substituents  $NH_2$  and  $OH$  are excluded in correlation]

(b) Plot of  $V_o^E$  with PE values derived by Exner (PE represents polar effect and the values are taken from Ref.60).

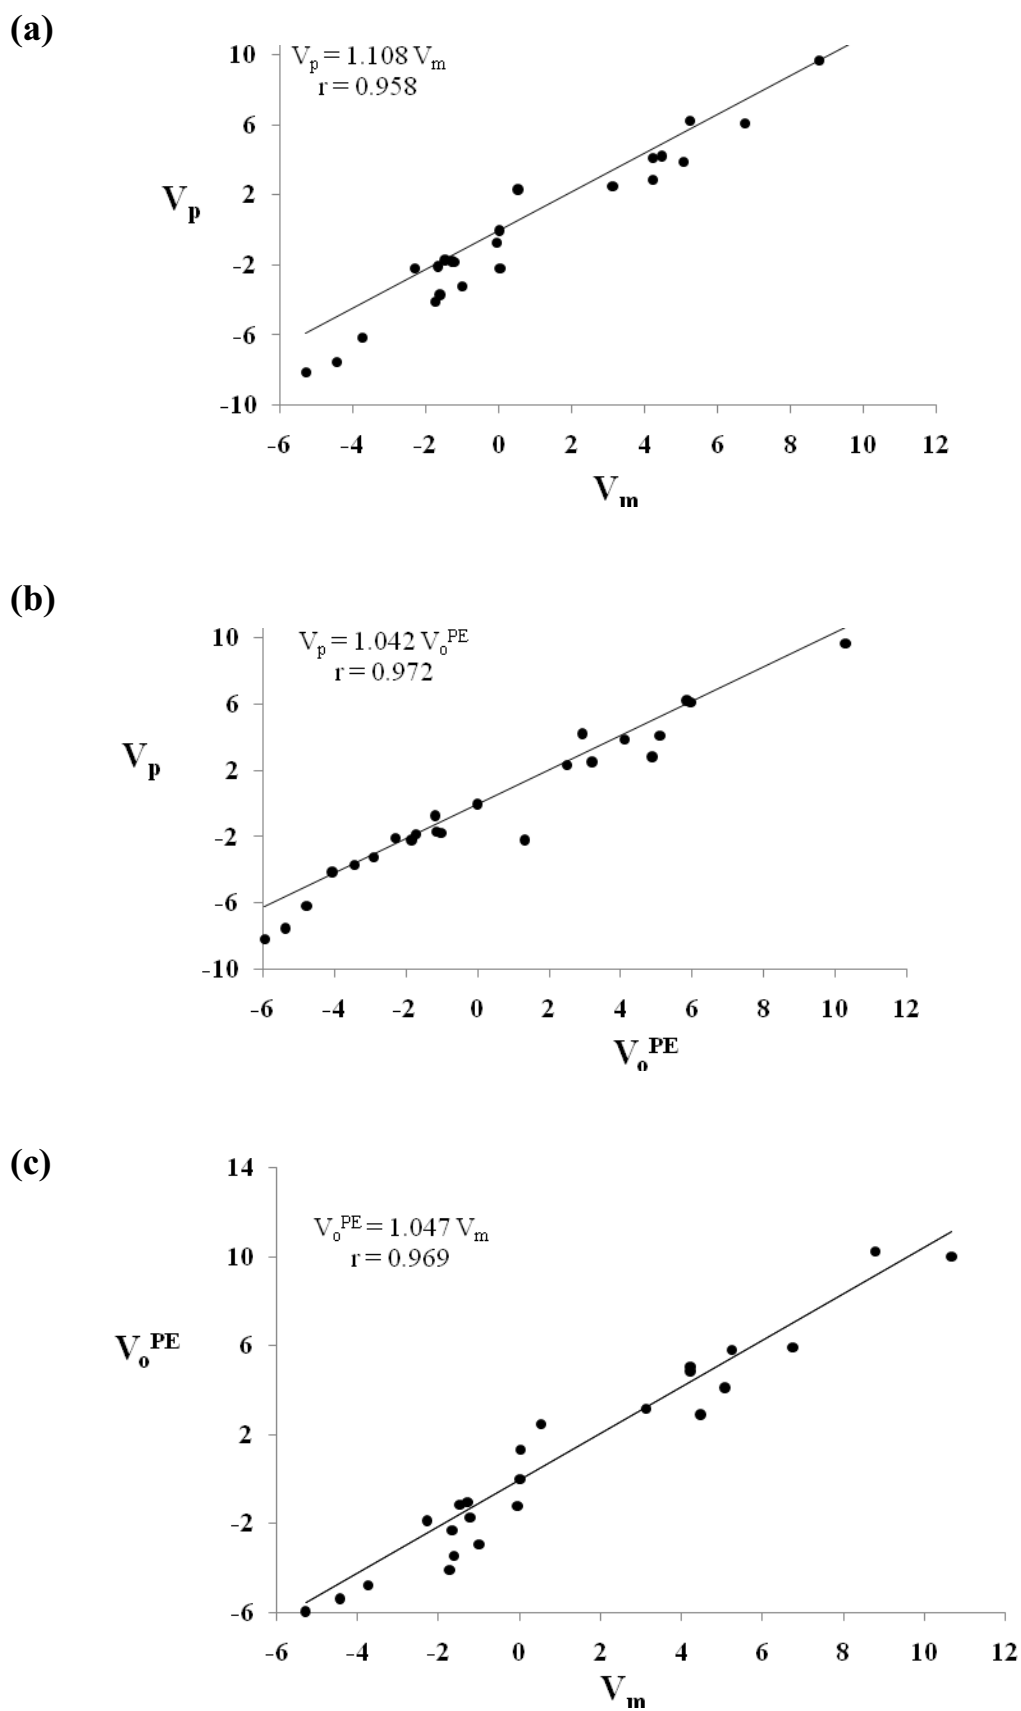

**Fig. S3** Inter relationships between electronic effects of ortho, meta and para substituent effects. (a) Plot of  $V_p$  vs  $V_m$  (b) Plot of  $V_p$  vs  $V_o^{PE}$  (c) plot of  $V_o^{PE}$  vs  $V_m$ .

**Table S2 B3LYP/6-31G(d,p) optimized geometry of benzoic acid**

Benzoic acid molecule  $E_{\text{scf}} = -420.8354491 \text{ a.u.}$

|   |              |              |              |
|---|--------------|--------------|--------------|
| 6 | 0.511811000  | 1.222115000  | -0.000147000 |
| 6 | 1.903315000  | 1.187028000  | -0.000243000 |
| 6 | 2.570147000  | -0.041018000 | -0.000044000 |
| 6 | 1.843664000  | -1.233975000 | 0.000212000  |
| 6 | 0.450507000  | -1.204121000 | 0.000312000  |
| 6 | -0.219988000 | 0.026941000  | 0.000071000  |
| 6 | -1.703666000 | 0.120873000  | 0.000095000  |
| 8 | -2.314944000 | -1.091282000 | -0.000724000 |
| 8 | -2.335512000 | 1.159029000  | 0.000489000  |
| 1 | -0.030154000 | 2.161640000  | -0.000532000 |
| 1 | 2.468783000  | 2.113940000  | -0.000379000 |
| 1 | 3.656028000  | -0.068327000 | -0.000119000 |
| 1 | 2.363355000  | -2.187371000 | 0.000202000  |
| 1 | -0.121064000 | -2.125092000 | 0.000704000  |
| 1 | -3.268041000 | -0.903820000 | 0.000473000  |

**Table S3** B3LYP/6-31G(d,p) optimized geometries of ortho substituted benzoic acids. SCF energy (in a.u.) is also provided

|                                                                     |              |              |              |                                                                    |              |              |              |
|---------------------------------------------------------------------|--------------|--------------|--------------|--------------------------------------------------------------------|--------------|--------------|--------------|
| O-CH <sub>3</sub> E <sub>scf</sub> = -460.1532948                   |              |              |              | O-CH <sub>2</sub> CH <sub>3</sub> E <sub>scf</sub> = -460.1532948  |              |              |              |
| 6                                                                   | -0.534855000 | 0.976764000  | -0.000288000 | 6                                                                  | 0.364574000  | 0.792484000  | -0.284615000 |
| 6                                                                   | -1.933162000 | 0.888854000  | -0.000082000 | 6                                                                  | 1.726328000  | 1.125197000  | -0.250125000 |
| 6                                                                   | -2.597617000 | -0.336059000 | 0.000019000  | 6                                                                  | 2.716121000  | 0.179759000  | 0.006311000  |
| 6                                                                   | -1.867693000 | -1.524363000 | 0.000112000  | 6                                                                  | 2.363724000  | -1.151271000 | 0.230138000  |
| 6                                                                   | -0.478706000 | -1.468586000 | 0.000132000  | 6                                                                  | 1.023008000  | -1.514003000 | 0.193705000  |
| 6                                                                   | 0.197679000  | -0.236508000 | -0.000049000 | 6                                                                  | 0.016836000  | -0.562219000 | -0.053625000 |
| 6                                                                   | 1.684644000  | -0.229612000 | 0.000105000  | 6                                                                  | -1.400599000 | -1.017865000 | -0.070515000 |
| 8                                                                   | 2.221808000  | -1.480443000 | -0.000368000 | 8                                                                  | -1.520586000 | -2.371653000 | 0.000794000  |
| 8                                                                   | 2.400888000  | 0.754490000  | 0.000365000  | 8                                                                  | -2.391371000 | -0.313079000 | -0.135290000 |
| 1                                                                   | -2.510748000 | 1.809061000  | 0.000024000  | 1                                                                  | 2.010267000  | 2.158178000  | -0.433241000 |
| 1                                                                   | -3.683672000 | -0.360236000 | -0.000071000 | 1                                                                  | 3.759576000  | 0.481397000  | 0.025717000  |
| 1                                                                   | -2.374304000 | -2.484425000 | 0.000345000  | 1                                                                  | 3.125101000  | -1.899508000 | 0.427186000  |
| 1                                                                   | 0.102086000  | -2.382866000 | 0.000426000  | 1                                                                  | 0.735970000  | -2.544865000 | 0.360371000  |
| 1                                                                   | 3.183225000  | -1.343360000 | -0.000260000 | 1                                                                  | -2.476855000 | -2.541524000 | -0.002304000 |
| 6                                                                   | 0.106829000  | 2.343027000  | -0.000030000 | 6                                                                  | -0.631007000 | 1.905158000  | -0.548684000 |
| 1                                                                   | 0.751017000  | 2.484650000  | 0.871630000  | 1                                                                  | -0.113988000 | 2.691876000  | -1.110521000 |
| 1                                                                   | 0.751720000  | 2.484776000  | -0.871173000 | 1                                                                  | -1.452072000 | 1.541520000  | -1.168013000 |
| 1                                                                   | -0.663598000 | 3.118925000  | -0.000408000 | 6                                                                  | -1.212752000 | 2.509440000  | 0.742052000  |
|                                                                     |              |              |              | 1                                                                  | -1.779543000 | 1.757876000  | 1.295542000  |
|                                                                     |              |              |              | 1                                                                  | -0.419969000 | 2.897304000  | 1.390376000  |
|                                                                     |              |              |              | 1                                                                  | -1.890232000 | 3.335518000  | 0.503003000  |
| O-CH(CH <sub>3</sub> ) <sub>2</sub> E <sub>scf</sub> = -538.7823509 |              |              |              | O-C(CH <sub>3</sub> ) <sub>3</sub> E <sub>scf</sub> = -578.0872517 |              |              |              |
| 6                                                                   | 0.517537000  | 0.385525000  | -0.067459000 | 6                                                                  | -0.275191000 | 0.610113000  | 0.009202000  |
| 6                                                                   | 0.786613000  | 1.759266000  | 0.021827000  | 6                                                                  | -0.150620000 | 2.009360000  | 0.034032000  |
| 6                                                                   | -0.223587000 | 2.710749000  | 0.142609000  | 6                                                                  | 1.076567000  | 2.669476000  | 0.077390000  |
| 6                                                                   | -1.558957000 | 2.311523000  | 0.165060000  | 6                                                                  | 2.259001000  | 1.939204000  | 0.075237000  |
| 6                                                                   | -1.860387000 | 0.958690000  | 0.073077000  | 6                                                                  | 2.181822000  | 0.552648000  | 0.041161000  |
| 6                                                                   | -0.845114000 | -0.009876000 | -0.029783000 | 6                                                                  | 0.947259000  | -0.122055000 | 0.030399000  |
| 6                                                                   | -1.257449000 | -1.441297000 | -0.074136000 | 6                                                                  | 1.065967000  | -1.612350000 | 0.107836000  |
| 8                                                                   | -2.573704000 | -1.598920000 | -0.382399000 | 8                                                                  | 2.114183000  | -2.075651000 | -0.624707000 |
| 8                                                                   | -0.554712000 | -2.411497000 | 0.144170000  | 8                                                                  | 0.385367000  | -2.377614000 | 0.763119000  |
| 1                                                                   | 1.816908000  | 2.096154000  | -0.006355000 | 1                                                                  | -1.043240000 | 2.619260000  | 0.012303000  |
| 1                                                                   | 0.035012000  | 3.763504000  | 0.214432000  | 1                                                                  | 1.098171000  | 3.755308000  | 0.102041000  |
| 1                                                                   | -2.355702000 | 3.043538000  | 0.252783000  | 1                                                                  | 3.224832000  | 2.434041000  | 0.097482000  |
| 1                                                                   | -2.892618000 | 0.630983000  | 0.087714000  | 1                                                                  | 3.091212000  | -0.036323000 | 0.035419000  |
| 1                                                                   | -2.729323000 | -2.557099000 | -0.345620000 | 1                                                                  | 2.148149000  | -3.030922000 | -0.446865000 |
| 6                                                                   | 1.679278000  | -0.599975000 | -0.185734000 | 6                                                                  | -1.695061000 | -0.011990000 | -0.068422000 |
| 1                                                                   | 1.303119000  | -1.496102000 | -0.681535000 | 6                                                                  | -2.092626000 | -0.593071000 | 1.311439000  |
| 6                                                                   | 2.853053000  | -0.064943000 | -1.024157000 | 6                                                                  | -1.774416000 | -1.102630000 | -1.164830000 |
| 1                                                                   | 2.520286000  | 0.307069000  | -1.998468000 | 1                                                                  | -1.469879000 | -0.700146000 | -2.137038000 |
| 1                                                                   | 3.397141000  | 0.742143000  | -0.521688000 | 1                                                                  | -1.165172000 | -1.976009000 | -0.940198000 |
| 1                                                                   | 3.572433000  | -0.871322000 | -1.199666000 | 1                                                                  | -2.809351000 | -1.448734000 | -1.257831000 |
| 6                                                                   | 2.159920000  | -1.033075000 | 1.214521000  | 1                                                                  | -1.409778000 | -1.381442000 | 1.624312000  |
| 1                                                                   | 2.530453000  | -0.173813000 | 1.785332000  | 1                                                                  | -3.106224000 | -1.007390000 | 1.259608000  |
| 1                                                                   | 1.348764000  | -1.501852000 | 1.775695000  | 1                                                                  | -2.092409000 | 0.195242000  | 2.072243000  |
| 1                                                                   | 2.975416000  | -1.759385000 | 1.128263000  | 6                                                                  | -2.761328000 | 1.045350000  | -0.440582000 |
|                                                                     |              |              |              | 1                                                                  | -2.889822000 | 1.805995000  | 0.335480000  |
|                                                                     |              |              |              | 1                                                                  | -2.534086000 | 1.548813000  | -1.386187000 |
|                                                                     |              |              |              | 1                                                                  | -3.727050000 | 0.544101000  | -0.555237000 |

|                                                                 |              |              |              |                                                                     |              |              |              |
|-----------------------------------------------------------------|--------------|--------------|--------------|---------------------------------------------------------------------|--------------|--------------|--------------|
| O-C <sub>6</sub> H <sub>5</sub> E <sub>scf</sub> = -651.8889278 |              |              |              | O-F E <sub>scf</sub> = -520.0609513                                 |              |              |              |
| 6                                                               | -0.481072000 | -0.661683000 | 0.017916000  | 6                                                                   | 0.551044000  | 0.954486000  | -0.000219000 |
| 6                                                               | -0.932019000 | -1.988832000 | 0.110491000  | 6                                                                   | 1.941438000  | 0.907860000  | -0.000255000 |
| 6                                                               | -2.288092000 | -2.300471000 | 0.174998000  | 6                                                                   | 2.582993000  | -0.328374000 | -0.000027000 |
| 6                                                               | -3.238794000 | -1.279347000 | 0.168706000  | 6                                                                   | 1.835274000  | -1.508944000 | 0.000220000  |
| 6                                                               | -2.817207000 | 0.041921000  | 0.073319000  | 6                                                                   | 0.446024000  | -1.446670000 | 0.000224000  |
| 6                                                               | -1.454922000 | 0.363811000  | -0.026747000 | 6                                                                   | -0.228957000 | -0.213113000 | 0.000014000  |
| 6                                                               | -1.168867000 | 1.817370000  | -0.228189000 | 6                                                                   | -1.714290000 | -0.146049000 | 0.000071000  |
| 8                                                               | -0.050124000 | 2.064518000  | -0.946627000 | 8                                                                   | -2.279957000 | -1.384811000 | 0.000006000  |
| 8                                                               | -1.896845000 | 2.712914000  | 0.154756000  | 8                                                                   | -2.388341000 | 0.861496000  | 0.000462000  |
| 1                                                               | -0.193633000 | -2.782932000 | 0.163275000  | 1                                                                   | 2.492562000  | 1.841589000  | -0.000469000 |
| 1                                                               | -2.599042000 | -3.338590000 | 0.248309000  | 1                                                                   | 3.668073000  | -0.367701000 | -0.000041000 |
| 1                                                               | -4.297486000 | -1.510131000 | 0.233985000  | 1                                                                   | 2.333942000  | -2.472519000 | 0.000406000  |
| 1                                                               | -3.533816000 | 0.855695000  | 0.056128000  | 1                                                                   | -0.143324000 | -2.355606000 | 0.000386000  |
| 1                                                               | 0.008642000  | 3.032515000  | -1.014572000 | 1                                                                   | -3.238657000 | -1.228495000 | 0.000173000  |
| 6                                                               | 0.990535000  | -0.425225000 | 0.048985000  | 9                                                                   | -0.027486000 | 2.161565000  | -0.000485000 |
| 6                                                               | 1.833135000  | -1.083411000 | -0.858370000 |                                                                     |              |              |              |
| 6                                                               | 1.569795000  | 0.394107000  | 1.030156000  |                                                                     |              |              |              |
| 6                                                               | 3.216582000  | -0.915283000 | -0.797260000 |                                                                     |              |              |              |
| 6                                                               | 2.951773000  | 0.557071000  | 1.095506000  |                                                                     |              |              |              |
| 6                                                               | 3.780623000  | -0.095132000 | 0.180160000  |                                                                     |              |              |              |
| 1                                                               | 1.397091000  | -1.715259000 | -1.626677000 |                                                                     |              |              |              |
| 1                                                               | 0.931647000  | 0.891941000  | 1.754570000  |                                                                     |              |              |              |
| 1                                                               | 3.852746000  | -1.424697000 | -1.515344000 |                                                                     |              |              |              |
| 1                                                               | 3.382908000  | 1.189547000  | 1.866230000  |                                                                     |              |              |              |
| 1                                                               | 4.857870000  | 0.033071000  | 0.231036000  |                                                                     |              |              |              |
| O-Cl E <sub>scf</sub> = -880.4192247                            |              |              |              | O-Br E <sub>scf</sub> = -2991.9290605                               |              |              |              |
| 6                                                               | 0.539227000  | 0.717011000  | -0.006734000 | 6                                                                   | 0.106659000  | -0.639925000 | -0.000003000 |
| 6                                                               | 1.935973000  | 0.720232000  | -0.005507000 | 6                                                                   | -0.200061000 | -2.002274000 | 0.000077000  |
| 6                                                               | 2.642714000  | -0.478812000 | 0.019641000  | 6                                                                   | -1.525864000 | -2.427036000 | 0.000104000  |
| 6                                                               | 1.956671000  | -1.693447000 | 0.037371000  | 6                                                                   | -2.558343000 | -1.489029000 | 0.000036000  |
| 6                                                               | 0.567277000  | -1.695260000 | 0.029921000  | 6                                                                   | -2.251953000 | -0.133944000 | -0.000057000 |
| 6                                                               | -0.173664000 | -0.498797000 | 0.011505000  | 6                                                                   | -0.920577000 | 0.324269000  | -0.000068000 |
| 6                                                               | -1.664750000 | -0.572526000 | 0.032257000  | 6                                                                   | -0.667841000 | 1.795985000  | -0.000098000 |
| 8                                                               | -2.111908000 | -1.840988000 | -0.182142000 | 8                                                                   | -1.826756000 | 2.511288000  | -0.000204000 |
| 8                                                               | -2.434149000 | 0.343843000  | 0.220903000  | 8                                                                   | 0.410457000  | 2.349047000  | 0.000455000  |
| 1                                                               | 2.457459000  | 1.670219000  | -0.025514000 | 1                                                                   | 0.609989000  | -2.722044000 | 0.000115000  |
| 1                                                               | 3.728322000  | -0.458922000 | 0.023527000  | 1                                                                   | -1.745887000 | -3.490373000 | 0.000175000  |
| 1                                                               | 2.499633000  | -2.632768000 | 0.056099000  | 1                                                                   | -3.594957000 | -1.809916000 | 0.000058000  |
| 1                                                               | 0.024729000  | -2.632155000 | 0.042306000  | 1                                                                   | -3.046409000 | 0.601372000  | -0.000117000 |
| 1                                                               | -3.079768000 | -1.781499000 | -0.125963000 | 1                                                                   | -1.549563000 | 3.442023000  | 0.000015000  |
| 17                                                              | -0.240154000 | 2.283640000  | -0.058309000 | 35                                                                  | 1.964717000  | -0.213486000 | -0.000063000 |
| O- OCH <sub>3</sub> E <sub>scf</sub> = -535.3530417             |              |              |              | O- OCH <sub>2</sub> CH <sub>3</sub> E <sub>scf</sub> = -574.6753906 |              |              |              |
| 6                                                               | -0.742762000 | -0.282528000 | 0.000073000  | 6                                                                   | -0.248949000 | -0.527736000 | 0.000025000  |
| 6                                                               | -1.880500000 | 0.539692000  | -0.000161000 | 6                                                                   | -0.175993000 | -1.930294000 | -0.000023000 |
| 6                                                               | -1.752223000 | 1.926704000  | -0.000476000 | 6                                                                   | 1.058091000  | -2.575829000 | -0.000233000 |
| 6                                                               | -0.492987000 | 2.524821000  | -0.000484000 | 6                                                                   | 2.244577000  | -1.843722000 | -0.000378000 |
| 6                                                               | 0.638288000  | 1.716108000  | -0.000283000 | 6                                                                   | 2.180378000  | -0.454694000 | -0.000319000 |
| 6                                                               | 0.546014000  | 0.315468000  | -0.000103000 | 6                                                                   | 0.954120000  | 0.228811000  | -0.000140000 |
| 6                                                               | 1.786949000  | -0.503513000 | -0.000455000 | 6                                                                   | 0.940600000  | 1.715245000  | -0.000206000 |
| 8                                                               | 2.911728000  | 0.273917000  | 0.002873000  | 8                                                                   | 2.204060000  | 2.238085000  | 0.000455000  |
| 8                                                               | 1.869720000  | -1.713862000 | -0.003380000 | 8                                                                   | -0.030399000 | 2.442982000  | -0.000744000 |
| 1                                                               | -2.869320000 | 0.099244000  | -0.000086000 | 1                                                                   | -1.083048000 | -2.520786000 | 0.000116000  |
| 1                                                               | -2.649001000 | 2.539903000  | -0.000692000 | 1                                                                   | 1.085636000  | -3.661904000 | -0.000274000 |
| 1                                                               | -0.393108000 | 3.605085000  | -0.000657000 | 1                                                                   | 3.205671000  | -2.346976000 | -0.000538000 |
| 1                                                               | 1.625066000  | 2.162065000  | -0.000332000 | 1                                                                   | 3.091262000  | 0.131024000  | -0.000429000 |
| 1                                                               | 3.647956000  | -0.359012000 | 0.001856000  | 1                                                                   | 2.072037000  | 3.199957000  | 0.000273000  |



|                                                                       |              |              |              |                                                                     |              |              |              |
|-----------------------------------------------------------------------|--------------|--------------|--------------|---------------------------------------------------------------------|--------------|--------------|--------------|
| 8                                                                     | -0.811879000 | -1.632623000 | 0.000585000  | 8                                                                   | -1.419382000 | 0.146241000  | 0.000291000  |
| 6                                                                     | -2.086355000 | -2.259415000 | 0.001132000  | 6                                                                   | -2.652757000 | -0.576367000 | 0.000380000  |
| 1                                                                     | -2.665996000 | -1.999422000 | 0.895576000  | 1                                                                   | -2.708007000 | -1.220454000 | 0.888947000  |
| 1                                                                     | -2.666257000 | -2.000494000 | -0.893450000 | 1                                                                   | -2.708221000 | -1.220308000 | -0.888278000 |
| 1                                                                     | -1.884438000 | -3.330843000 | 0.001691000  | 6                                                                   | -3.771864000 | 0.448762000  | 0.000597000  |
| O- OCH(CH <sub>3</sub> ) <sub>2</sub> E <sub>scf</sub> = -613.9946837 |              |              |              | O- CONH <sub>2</sub> E <sub>scf</sub> = -589.5357441                |              |              |              |
| 6                                                                     | 0.049217000  | 0.449466000  | -0.112011000 | 6                                                                   | -0.630834000 | 0.427648000  | -0.028354000 |
| 6                                                                     | 0.131956000  | 1.850579000  | -0.188057000 | 6                                                                   | -0.887030000 | 1.806405000  | -0.069602000 |
| 6                                                                     | -1.019553000 | 2.632863000  | -0.169896000 | 6                                                                   | 0.131288000  | 2.749444000  | -0.154858000 |
| 6                                                                     | -2.280497000 | 2.045276000  | -0.072850000 | 6                                                                   | 1.460794000  | 2.332028000  | -0.158493000 |
| 6                                                                     | -2.372326000 | 0.660839000  | 0.007351000  | 6                                                                   | 1.746970000  | 0.975241000  | -0.076358000 |
| 6                                                                     | -1.231975000 | -0.158708000 | -0.006742000 | 6                                                                   | 0.725590000  | 0.006384000  | -0.029054000 |
| 6                                                                     | -1.389850000 | -1.633611000 | 0.095198000  | 6                                                                   | 1.190851000  | -1.412133000 | 0.012319000  |
| 8                                                                     | -2.705826000 | -2.006742000 | 0.100354000  | 8                                                                   | 2.390880000  | -1.542032000 | 0.621620000  |
| 8                                                                     | -0.511335000 | -2.467126000 | 0.173551000  | 8                                                                   | 0.636887000  | -2.393185000 | -0.459397000 |
| 1                                                                     | 1.096314000  | 2.336142000  | -0.261239000 | 1                                                                   | -1.923950000 | 2.115653000  | -0.016165000 |
| 1                                                                     | -0.923185000 | 3.713349000  | -0.230544000 | 1                                                                   | -0.114518000 | 3.805926000  | -0.205594000 |
| 1                                                                     | -3.177015000 | 2.655943000  | -0.057106000 | 1                                                                   | 2.269880000  | 3.053597000  | -0.213626000 |
| 1                                                                     | -3.341731000 | 0.184606000  | 0.085388000  | 1                                                                   | 2.625677000  | -2.482317000 | 0.544414000  |
| 1                                                                     | -2.685710000 | -2.974049000 | 0.180928000  | 1                                                                   | 2.777751000  | 0.643962000  | -0.054232000 |
| 8                                                                     | 1.123367000  | -0.367036000 | -0.152806000 | 6                                                                   | -1.914939000 | -0.392910000 | 0.110185000  |
| 6                                                                     | 2.469559000  | 0.147877000  | -0.214622000 | 8                                                                   | -2.883899000 | 0.117040000  | 0.667470000  |
| 1                                                                     | 2.500742000  | 0.990748000  | -0.917434000 | 7                                                                   | -1.968653000 | -1.616022000 | -0.466216000 |
| 6                                                                     | 3.307420000  | -0.994905000 | -0.775374000 | 1                                                                   | -2.818636000 | -2.136800000 | -0.307295000 |
| 1                                                                     | 2.946939000  | -1.285789000 | -1.765201000 | 1                                                                   | -1.122724000 | -2.095089000 | -0.756245000 |
| 1                                                                     | 3.243661000  | -1.867034000 | -0.118609000 |                                                                     |              |              |              |
| 1                                                                     | 4.355540000  | -0.691625000 | -0.858270000 |                                                                     |              |              |              |
| 6                                                                     | 2.932053000  | 0.593907000  | 1.171703000  |                                                                     |              |              |              |
| 1                                                                     | 3.955296000  | 0.980118000  | 1.124290000  |                                                                     |              |              |              |
| 1                                                                     | 2.289871000  | 1.378749000  | 1.579673000  |                                                                     |              |              |              |
| 1                                                                     | 2.913597000  | -0.255428000 | 1.861129000  |                                                                     |              |              |              |
| O-OH E <sub>scf</sub> = -496.0682445                                  |              |              |              | O- NH <sub>2</sub> E <sub>scf</sub> = -476.2013253                  |              |              |              |
| 6                                                                     | 0.506423000  | 0.982331000  | 0.000020000  | 6                                                                   | -0.528762000 | 0.988350000  | -0.010809000 |
| 6                                                                     | 1.911259000  | 0.965893000  | -0.000039000 | 6                                                                   | -1.941339000 | 0.906491000  | 0.006747000  |
| 6                                                                     | 2.593934000  | -0.240745000 | -0.000060000 | 6                                                                   | -2.587873000 | -0.316389000 | 0.013919000  |
| 6                                                                     | 1.904202000  | -1.464463000 | -0.000022000 | 6                                                                   | -1.861740000 | -1.517997000 | 0.004209000  |
| 6                                                                     | 0.519606000  | -1.461560000 | 0.000019000  | 6                                                                   | -0.478833000 | -1.461611000 | -0.007464000 |
| 6                                                                     | -0.199434000 | -0.249641000 | 0.000026000  | 6                                                                   | 0.211185000  | -0.232475000 | -0.011472000 |
| 6                                                                     | -1.663001000 | -0.217783000 | -0.000020000 | 6                                                                   | 1.678122000  | -0.203922000 | 0.003729000  |
| 8                                                                     | -2.259158000 | -1.426902000 | 0.000144000  | 8                                                                   | 2.254191000  | -1.433490000 | -0.012664000 |
| 8                                                                     | -2.338896000 | 0.813978000  | -0.000286000 | 8                                                                   | 2.381747000  | 0.802705000  | 0.033887000  |
| 1                                                                     | 2.433035000  | 1.916625000  | -0.000037000 | 1                                                                   | -2.515613000 | 1.829338000  | 0.008750000  |
| 1                                                                     | 3.680298000  | -0.235570000 | -0.000094000 | 1                                                                   | -3.674204000 | -0.340123000 | 0.026612000  |
| 1                                                                     | 2.450660000  | -2.401511000 | -0.000040000 | 1                                                                   | -2.374692000 | -2.473625000 | 0.008116000  |
| 1                                                                     | -0.035379000 | -2.392861000 | 0.000021000  | 1                                                                   | 3.210724000  | -1.267023000 | 0.005110000  |
| 1                                                                     | -3.215458000 | -1.254330000 | 0.000047000  | 1                                                                   | 0.105307000  | -2.374464000 | -0.009429000 |
| 8                                                                     | -0.110608000 | 2.173585000  | 0.000142000  | 7                                                                   | 0.083774000  | 2.204835000  | -0.051869000 |
| 1                                                                     | -1.081794000 | 1.998165000  | 0.000552000  | 1                                                                   | 1.090575000  | 2.228949000  | 0.047641000  |
| O- NHCH <sub>3</sub> E <sub>scf</sub> = -515.5109166                  |              |              |              | O- N(CH <sub>3</sub> ) <sub>2</sub> E <sub>scf</sub> = -554.7995971 |              |              |              |
| 6                                                                     | -0.754142000 | -0.221753000 | -0.000012000 | 6                                                                   | -0.520615000 | 0.521469000  | -0.006991000 |
| 6                                                                     | -1.827609000 | 0.703740000  | -0.000048000 | 6                                                                   | -0.573578000 | 1.934651000  | -0.070101000 |
| 6                                                                     | -1.594377000 | 2.069196000  | 0.000001000  | 6                                                                   | 0.574674000  | 2.711415000  | -0.020549000 |

|                                         |              |              |              |                                                    |              |              |              |
|-----------------------------------------|--------------|--------------|--------------|----------------------------------------------------|--------------|--------------|--------------|
| 6                                       | -0.290842000 | 2.585415000  | 0.000037000  | 6                                                  | 1.834597000  | 2.118610000  | 0.103610000  |
| 6                                       | 0.774574000  | 1.700315000  | -0.000017000 | 6                                                  | 1.917387000  | 0.734787000  | 0.128153000  |
| 6                                       | 0.578835000  | 0.306326000  | -0.000033000 | 6                                                  | 0.774364000  | -0.083755000 | 0.036953000  |
| 6                                       | 1.734127000  | -0.596116000 | -0.000035000 | 6                                                  | 0.985421000  | -1.530128000 | -0.207583000 |
| 8                                       | 2.934661000  | 0.038720000  | 0.000134000  | 8                                                  | 2.231958000  | -1.951339000 | 0.159242000  |
| 8                                       | 1.694414000  | -1.825530000 | -0.000109000 | 8                                                  | 0.203298000  | -2.306139000 | -0.726902000 |
| 1                                       | -2.846591000 | 0.335375000  | -0.000235000 | 1                                                  | -1.536840000 | 2.428501000  | -0.107544000 |
| 1                                       | -2.443880000 | 2.747144000  | -0.000029000 | 1                                                  | 0.481310000  | 3.793637000  | -0.052756000 |
| 1                                       | -0.118878000 | 3.656278000  | 0.000038000  | 1                                                  | 2.732294000  | 2.725100000  | 0.160528000  |
| 1                                       | 1.792629000  | 2.071684000  | -0.000013000 | 1                                                  | 2.885592000  | 0.251465000  | 0.176695000  |
| 1                                       | 3.597202000  | -0.671136000 | 0.000030000  | 1                                                  | 2.273317000  | -2.878675000 | -0.126145000 |
| 7                                       | -0.983006000 | -1.562938000 | -0.000121000 | 7                                                  | -1.695236000 | -0.211224000 | 0.019020000  |
| 1                                       | -0.153520000 | -2.145470000 | 0.000037000  | 6                                                  | -2.940445000 | 0.391698000  | -0.421516000 |
| 6                                       | -2.294611000 | -2.167493000 | 0.000135000  | 1                                                  | -2.777288000 | 1.001322000  | -1.313042000 |
| 1                                       | -2.174846000 | -3.252418000 | 0.000459000  | 1                                                  | -3.639307000 | -0.406159000 | -0.689213000 |
| 1                                       | -2.879620000 | -1.891813000 | 0.888350000  | 1                                                  | -3.421954000 | 1.016556000  | 0.349320000  |
| 1                                       | -2.879792000 | -1.892382000 | -0.888157000 | 6                                                  | -1.865203000 | -1.366852000 | 0.892374000  |
| O- NHOH $E_{\text{scf}} = -551.3593161$ |              |              |              | O- NO <sub>2</sub> $E_{\text{scf}} = -625.318279$  |              |              |              |
| 6                                       | -0.720203000 | -0.332986000 | 0.079864000  | 6                                                  | -0.536263000 | 0.558586000  | -0.014561000 |
| 6                                       | -1.917674000 | 0.406379000  | 0.035692000  | 6                                                  | -1.918864000 | 0.704721000  | -0.008630000 |
| 6                                       | -1.890627000 | 1.791524000  | -0.019672000 | 6                                                  | -2.724854000 | -0.432970000 | 0.006262000  |
| 6                                       | -0.676953000 | 2.491940000  | -0.032386000 | 6                                                  | -2.140092000 | -1.698670000 | 0.015508000  |
| 6                                       | 0.509759000  | 1.777219000  | -0.006731000 | 6                                                  | -0.750696000 | -1.829500000 | 0.024914000  |
| 6                                       | 0.518480000  | 0.370118000  | 0.039593000  | 6                                                  | 0.076517000  | -0.701525000 | 0.019130000  |
| 6                                       | 1.792406000  | -0.363576000 | -0.003814000 | 6                                                  | 1.553854000  | -0.877020000 | 0.207956000  |
| 8                                       | 2.887499000  | 0.435872000  | -0.009242000 | 8                                                  | 2.038378000  | -1.882082000 | -0.556477000 |
| 8                                       | 1.917306000  | -1.583508000 | -0.046006000 | 8                                                  | 2.224501000  | -0.257353000 | 0.999437000  |
| 1                                       | -2.855535000 | -0.133419000 | 0.034705000  | 1                                                  | -2.339971000 | 1.702377000  | -0.030814000 |
| 1                                       | -2.830139000 | 2.336287000  | -0.053774000 | 1                                                  | -3.804679000 | -0.326470000 | 0.001237000  |
| 1                                       | -0.664423000 | 3.575969000  | -0.070165000 | 1                                                  | -2.763119000 | -2.587333000 | 0.021441000  |
| 1                                       | 1.461645000  | 2.294219000  | -0.033872000 | 1                                                  | -0.292958000 | -2.811842000 | 0.052935000  |
| 1                                       | 3.646940000  | -0.167805000 | -0.055198000 | 1                                                  | 2.981235000  | -1.960077000 | -0.330274000 |
| 7                                       | -0.749645000 | -1.710759000 | 0.237147000  | 7                                                  | 0.265262000  | 1.788898000  | -0.155527000 |
| 1                                       | 0.082328000  | -2.186126000 | -0.107948000 | 8                                                  | 1.284726000  | 1.722329000  | -0.836006000 |
| 8                                       | -1.927266000 | -2.332596000 | -0.253062000 | 8                                                  | -0.171974000 | 2.807022000  | 0.376881000  |
| 1                                       | -2.304742000 | -2.745674000 | 0.537439000  | O- CF <sub>3</sub> $E_{\text{scf}} = -757.8595559$ |              |              |              |
| 6                                       | 0.190427000  | -0.637568000 | 0.007008000  | 6                                                  | 0.730680000  | 0.435791000  | -0.000361000 |
| 6                                       | -0.044997000 | -2.013623000 | 0.021483000  | 6                                                  | 1.965737000  | -0.225763000 | -0.000020000 |
| 6                                       | -1.342800000 | -2.524243000 | 0.048889000  | 6                                                  | 2.045131000  | -1.614171000 | 0.000440000  |
| 6                                       | -2.428892000 | -1.654608000 | 0.050385000  | 6                                                  | 0.873559000  | -2.372102000 | 0.000442000  |
| 6                                       | -2.208465000 | -0.279474000 | 0.030786000  | 6                                                  | -0.365130000 | -1.735947000 | 0.000108000  |
| 6                                       | -0.910434000 | 0.250152000  | 0.018952000  | 6                                                  | -0.460047000 | -0.335300000 | -0.000204000 |
| 6                                       | -0.753811000 | 1.738411000  | 0.063151000  | 6                                                  | -1.820245000 | 0.284563000  | -0.000088000 |
| 8                                       | -1.892066000 | 2.379643000  | -0.313925000 | 8                                                  | -2.812371000 | -0.641740000 | -0.001564000 |
| 8                                       | 0.234944000  | 2.345766000  | 0.407355000  | 8                                                  | -2.078355000 | 1.472945000  | 0.002504000  |
| 1                                       | 0.799938000  | -2.689785000 | 0.003079000  | 1                                                  | 2.858392000  | 0.390539000  | -0.000179000 |
| 1                                       | -1.496825000 | -3.598724000 | 0.061667000  | 1                                                  | 3.014553000  | -2.103451000 | 0.000728000  |
| 1                                       | -3.443850000 | -2.039071000 | 0.066406000  | 1                                                  | 0.920855000  | -3.456743000 | 0.000723000  |
| 1                                       | -3.047391000 | 0.405082000  | 0.032673000  | 1                                                  | -1.274257000 | -2.323781000 | 0.000178000  |
| 1                                       | -1.697954000 | 3.326731000  | -0.216797000 | 1                                                  | -3.640442000 | -0.133637000 | -0.000557000 |
| 6                                       | 1.639333000  | -0.178678000 | -0.044985000 | 6                                                  | 0.791777000  | 1.937533000  | -0.001453000 |
| 9                                       | 2.467705000  | -1.232842000 | -0.263094000 | 8                                                  | 1.855601000  | 2.532306000  | 0.000107000  |
| 9                                       | 1.858448000  | 0.689547000  | -1.050491000 | 1                                                  | -0.166873000 | 2.471367000  | -0.002444000 |
| 9                                       | 2.040614000  | 0.386659000  | 1.105976000  | O- CHO $E_{\text{scf}} = -534.1511824$             |              |              |              |

|                                                     |              |              |              |                                                      |              |              |              |
|-----------------------------------------------------|--------------|--------------|--------------|------------------------------------------------------|--------------|--------------|--------------|
| O- CN E <sub>scf</sub> = -513.0684712               |              |              |              | O- COCH <sub>3</sub> E <sub>scf</sub> = -573.4732232 |              |              |              |
| 6                                                   | -0.432328000 | 0.825973000  | 0.000001000  | 6                                                    | -0.000113000 | -0.746295000 | -0.035493000 |
| 6                                                   | -1.826579000 | 0.994903000  | 0.000000000  | 6                                                    | 0.893564000  | -1.822523000 | -0.025290000 |
| 6                                                   | -2.673522000 | -0.110007000 | -0.000008000 | 6                                                    | 2.269192000  | -1.611621000 | 0.059436000  |
| 6                                                   | -2.139073000 | -1.398709000 | -0.000012000 | 6                                                    | 2.775981000  | -0.312480000 | 0.115197000  |
| 6                                                   | -0.757695000 | -1.578334000 | -0.000011000 | 6                                                    | 1.902540000  | 0.770126000  | 0.073940000  |
| 6                                                   | 0.110103000  | -0.479839000 | -0.000007000 | 6                                                    | 0.516727000  | 0.565369000  | -0.001759000 |
| 6                                                   | 1.587300000  | -0.680255000 | -0.000016000 | 6                                                    | -0.408610000 | 1.720045000  | -0.130238000 |
| 8                                                   | 1.933505000  | -1.992068000 | 0.000089000  | 8                                                    | 0.205284000  | 2.919874000  | 0.013202000  |
| 8                                                   | 2.412299000  | 0.207109000  | -0.000113000 | 8                                                    | -1.601928000 | 1.634477000  | -0.352771000 |
| 1                                                   | -2.231585000 | 2.000768000  | 0.000007000  | 1                                                    | 0.498120000  | -2.831717000 | -0.082083000 |
| 1                                                   | -3.748837000 | 0.037672000  | -0.000009000 | 1                                                    | 2.944602000  | -2.461920000 | 0.075000000  |
| 1                                                   | -2.795514000 | -2.263024000 | -0.000018000 | 1                                                    | 3.846449000  | -0.143366000 | 0.176215000  |
| 1                                                   | -0.335662000 | -2.575728000 | -0.000013000 | 1                                                    | 2.284096000  | 1.784236000  | 0.085200000  |
| 1                                                   | 2.904970000  | -2.007655000 | 0.000068000  | 1                                                    | -0.487774000 | 3.588008000  | -0.117949000 |
| 6                                                   | 0.360744000  | 2.024255000  | 0.000020000  | 6                                                    | -1.477144000 | -1.098581000 | -0.092802000 |
| 7                                                   | 0.866644000  | 3.071389000  | 0.000052000  | 8                                                    | -1.898928000 | -1.735084000 | -1.039310000 |
|                                                     |              |              |              | 6                                                    | -2.325228000 | -0.821930000 | 1.132710000  |
|                                                     |              |              |              | 1                                                    | -2.154068000 | -1.635450000 | 1.849986000  |
|                                                     |              |              |              | 1                                                    | -2.069044000 | 0.118708000  | 1.619817000  |
|                                                     |              |              |              | 1                                                    | -3.379249000 | -0.825305000 | 0.850640000  |
| O-CH <sub>2</sub> F E <sub>scf</sub> = -559.3787832 |              |              |              |                                                      |              |              |              |
| 6                                                   | -0.711912000 | -0.291054000 | -0.000049000 |                                                      |              |              |              |
| 6                                                   | -1.860431000 | 0.505414000  | -0.000055000 |                                                      |              |              |              |
| 6                                                   | -1.772619000 | 1.896805000  | -0.000078000 |                                                      |              |              |              |
| 6                                                   | -0.526684000 | 2.524217000  | -0.000076000 |                                                      |              |              |              |
| 6                                                   | 0.627418000  | 1.748856000  | -0.000002000 |                                                      |              |              |              |
| 6                                                   | 0.550620000  | 0.346794000  | 0.000036000  |                                                      |              |              |              |
| 6                                                   | 1.793919000  | -0.461080000 | 0.000222000  |                                                      |              |              |              |
| 8                                                   | 2.925273000  | 0.287662000  | -0.000131000 |                                                      |              |              |              |
| 8                                                   | 1.842762000  | -1.679245000 | -0.000107000 |                                                      |              |              |              |
| 1                                                   | -2.826928000 | 0.017457000  | -0.000039000 |                                                      |              |              |              |
| 1                                                   | -2.681942000 | 2.491001000  | -0.000085000 |                                                      |              |              |              |
| 1                                                   | -0.454345000 | 3.607244000  | -0.000078000 |                                                      |              |              |              |
| 1                                                   | 1.603661000  | 2.218560000  | 0.000053000  |                                                      |              |              |              |
| 1                                                   | 3.658649000  | -0.349234000 | -0.000319000 |                                                      |              |              |              |
| 6                                                   | -0.870990000 | -1.796735000 | 0.000089000  |                                                      |              |              |              |
| 1                                                   | -0.403338000 | -2.245763000 | -0.880893000 |                                                      |              |              |              |
| 1                                                   | -0.403218000 | -2.245668000 | 0.881062000  |                                                      |              |              |              |
| 9                                                   | -2.223638000 | -2.133359000 | 0.000187000  |                                                      |              |              |              |

**Table S4** B3LYP/6-31G(d,p) optimized geometries of meta substituted benzoic acids. SCF energy (in a.u.) is also provided

|                                                                        |              |              |              |                                                                       |              |              |              |
|------------------------------------------------------------------------|--------------|--------------|--------------|-----------------------------------------------------------------------|--------------|--------------|--------------|
| m- CH <sub>3</sub> , E <sub>scf</sub> = -460.1562306                   |              |              |              | m- CH <sub>2</sub> CH <sub>3</sub> , E <sub>scf</sub> = -499.4708889  |              |              |              |
| 6                                                                      | -0.463954000 | -0.818830000 | -0.005945000 | 6                                                                     | 0.079358000  | -0.717285000 | 0.000056000  |
| 6                                                                      | -1.794821000 | -0.397866000 | -0.007246000 | 6                                                                     | 1.372846000  | -0.182215000 | 0.000104000  |
| 6                                                                      | -2.051605000 | 0.981932000  | -0.006718000 | 6                                                                     | 1.504183000  | 1.212170000  | -0.000107000 |
| 6                                                                      | -1.011030000 | 1.910526000  | -0.000441000 | 6                                                                     | 0.380537000  | 2.044648000  | -0.000325000 |
| 6                                                                      | 0.314468000  | 1.480159000  | 0.003676000  | 6                                                                     | -0.899578000 | 1.501823000  | -0.000339000 |
| 6                                                                      | 0.588028000  | 0.107003000  | 0.000395000  | 6                                                                     | -1.049370000 | 0.107198000  | -0.000147000 |
| 6                                                                      | 1.976432000  | -0.424029000 | -0.000221000 | 6                                                                     | -2.384675000 | -0.546389000 | -0.000170000 |
| 8                                                                      | 2.921248000  | 0.551669000  | 0.006585000  | 8                                                                     | -3.412589000 | 0.341350000  | -0.000235000 |
| 8                                                                      | 2.272833000  | -1.602867000 | -0.005655000 | 8                                                                     | -2.575000000 | -1.746977000 | -0.000120000 |
| 1                                                                      | -0.216519000 | -1.875700000 | -0.011385000 | 1                                                                     | -0.073257000 | -1.792674000 | 0.000191000  |
| 1                                                                      | -3.081390000 | 1.331243000  | -0.013230000 | 1                                                                     | 2.491461000  | 1.662277000  | -0.000111000 |
| 1                                                                      | -1.234865000 | 2.973146000  | -0.001934000 | 1                                                                     | 0.511015000  | 3.122788000  | -0.000488000 |
| 1                                                                      | 1.130114000  | 2.193580000  | 0.006248000  | 1                                                                     | -1.775453000 | 2.139849000  | -0.000500000 |
| 1                                                                      | 3.774634000  | 0.087705000  | 0.005789000  | 1                                                                     | -4.221340000 | -0.196670000 | -0.000251000 |
| 6                                                                      | -2.929687000 | -1.394732000 | 0.008824000  | 6                                                                     | 2.562388000  | -1.129165000 | 0.000320000  |
| 1                                                                      | -3.380834000 | -1.464782000 | 1.006053000  | 1                                                                     | 2.475068000  | -1.790468000 | 0.872614000  |
| 1                                                                      | -3.725255000 | -1.105831000 | -0.685567000 | 1                                                                     | 2.475533000  | -1.790247000 | -0.872188000 |
| 1                                                                      | -2.585516000 | -2.394755000 | -0.267357000 | 6                                                                     | 3.948482000  | -0.481705000 | 0.000765000  |
|                                                                        |              |              |              | 1                                                                     | 4.103515000  | 0.143515000  | 0.886303000  |
|                                                                        |              |              |              | 1                                                                     | 4.103852000  | 0.144010000  | -0.884366000 |
|                                                                        |              |              |              | 1                                                                     | 4.725281000  | -1.251841000 | 0.000702000  |
| m- CH(CH <sub>3</sub> ) <sub>2</sub> , E <sub>scf</sub> = -538.7884214 |              |              |              | m- C(CH <sub>3</sub> ) <sub>3</sub> , E <sub>scf</sub> = -578.1017962 |              |              |              |
| 6                                                                      | -0.139271000 | -0.613338000 | -0.000020000 | 6                                                                     | -0.294500000 | -0.463800000 | -0.000029000 |
| 6                                                                      | 1.098865000  | 0.031599000  | 0.000144000  | 6                                                                     | 0.891719000  | 0.274135000  | -0.000069000 |
| 6                                                                      | 1.108416000  | 1.435984000  | 0.000151000  | 6                                                                     | 0.777182000  | 1.676535000  | -0.000085000 |
| 6                                                                      | -0.079138000 | 2.167462000  | -0.000018000 | 6                                                                     | -0.463558000 | 2.311211000  | -0.000029000 |
| 6                                                                      | -1.309178000 | 1.512309000  | -0.000192000 | 6                                                                     | -1.637614000 | 1.560865000  | 0.000017000  |
| 6                                                                      | -1.338066000 | 0.112751000  | -0.000190000 | 6                                                                     | -1.548274000 | 0.165459000  | 0.000014000  |
| 6                                                                      | -2.612208000 | -0.652694000 | -0.000378000 | 6                                                                     | -2.754101000 | -0.703760000 | -0.000011000 |
| 8                                                                      | -3.712995000 | 0.143110000  | -0.000428000 | 8                                                                     | -3.917552000 | -0.002518000 | -0.000011000 |
| 8                                                                      | -2.698357000 | -1.865215000 | -0.000491000 | 8                                                                     | -2.739759000 | -1.919426000 | -0.000013000 |
| 1                                                                      | -0.197795000 | -1.697471000 | -0.000029000 | 1                                                                     | -0.286718000 | -1.546366000 | -0.000060000 |
| 1                                                                      | 2.056616000  | 1.967215000  | 0.000295000  | 1                                                                     | 1.674274000  | 2.288811000  | -0.000099000 |
| 1                                                                      | -0.044823000 | 3.252911000  | -0.000016000 | 1                                                                     | -0.513653000 | 3.396060000  | -0.000035000 |
| 1                                                                      | -2.237051000 | 2.072121000  | -0.000320000 | 1                                                                     | -2.608036000 | 2.043042000  | 0.000019000  |
| 1                                                                      | -4.472238000 | -0.462769000 | -0.000573000 | 1                                                                     | -4.623370000 | -0.669819000 | -0.000025000 |
| 6                                                                      | 2.393441000  | -0.771318000 | 0.000369000  | 6                                                                     | 2.283812000  | -0.383654000 | -0.000018000 |
| 1                                                                      | 2.110230000  | -1.831621000 | 0.000418000  | 6                                                                     | 3.060548000  | 0.059083000  | 1.262693000  |
| 6                                                                      | 3.224655000  | -0.513984000 | 1.270847000  | 6                                                                     | 3.061306000  | 0.059943000  | -1.261922000 |
| 6                                                                      | 3.224995000  | -0.514195000 | -1.269930000 | 1                                                                     | 2.538092000  | -0.247560000 | -2.173115000 |
| 1                                                                      | 2.646969000  | -0.732150000 | -2.173085000 | 1                                                                     | 3.191486000  | 1.145521000  | -1.301542000 |
| 1                                                                      | 3.552678000  | 0.529702000  | -1.327164000 | 1                                                                     | 4.058121000  | -0.394528000 | -1.272957000 |
| 1                                                                      | 4.121401000  | -1.143451000 | -1.278512000 | 1                                                                     | 3.190671000  | 1.144644000  | 1.303018000  |
| 1                                                                      | 3.552301000  | 0.529931000  | 1.327997000  | 1                                                                     | 4.057334000  | -0.395450000 | 1.274092000  |
| 1                                                                      | 4.121070000  | -1.143224000 | 1.279764000  | 1                                                                     | 2.536698000  | -0.248976000 | 2.173329000  |
| 1                                                                      | 2.646395000  | -0.731804000 | 2.173883000  | 6                                                                     | 2.201051000  | -1.921360000 | -0.000601000 |
|                                                                        |              |              |              | 1                                                                     | 1.683518000  | -2.302138000 | 0.885622000  |
|                                                                        |              |              |              | 1                                                                     | 1.683886000  | -2.301550000 | -0.887288000 |
|                                                                        |              |              |              | 1                                                                     | 3.210763000  | -2.344088000 | -0.000528000 |
| m- C <sub>6</sub> H <sub>5</sub> , E <sub>scf</sub> = -651.8988713     |              |              |              | m- F, E <sub>scf</sub> = -520.0662222                                 |              |              |              |

|                                                |              |              |              |                                                                |              |              |              |
|------------------------------------------------|--------------|--------------|--------------|----------------------------------------------------------------|--------------|--------------|--------------|
| 6                                              | 0.778710000  | -0.358755000 | 0.057690000  | 6                                                              | 0.148282000  | 1.503180000  | 0.000192000  |
| 6                                              | -0.271948000 | 0.556363000  | -0.086628000 | 6                                                              | -1.208758000 | 1.816976000  | 0.000315000  |
| 6                                              | 0.054902000  | 1.909953000  | -0.283828000 | 6                                                              | -2.168420000 | 0.802857000  | 0.000188000  |
| 6                                              | 1.382841000  | 2.331910000  | -0.331646000 | 6                                                              | -1.740747000 | -0.521087000 | -0.000063000 |
| 6                                              | 2.419703000  | 1.412720000  | -0.187600000 | 6                                                              | -0.396630000 | -0.866147000 | -0.000198000 |
| 6                                              | 2.112730000  | 0.059628000  | 0.006792000  | 6                                                              | 0.554402000  | 0.162422000  | -0.000077000 |
| 6                                              | 3.167685000  | -0.975390000 | 0.174743000  | 6                                                              | 2.015086000  | -0.124123000 | -0.000237000 |
| 8                                              | 4.425518000  | -0.467301000 | 0.119367000  | 8                                                              | 2.294807000  | -1.451222000 | -0.000046000 |
| 8                                              | 2.960660000  | -2.160735000 | 0.344515000  | 8                                                              | 2.886640000  | 0.721604000  | 0.000107000  |
| 1                                              | 0.579097000  | -1.409810000 | 0.234846000  | 1                                                              | 0.907640000  | 2.276557000  | 0.000275000  |
| 1                                              | -0.742081000 | 2.633975000  | -0.423880000 | 1                                                              | -1.526408000 | 2.854853000  | 0.000515000  |
| 1                                              | 1.608765000  | 3.381804000  | -0.491920000 | 1                                                              | -3.231098000 | 1.019555000  | 0.000276000  |
| 1                                              | 3.454577000  | 1.731758000  | -0.225094000 | 1                                                              | -0.101947000 | -1.907950000 | -0.000397000 |
| 1                                              | 5.019608000  | -1.226534000 | 0.238591000  | 1                                                              | 3.263979000  | -1.517097000 | 0.000104000  |
| 6                                              | -1.688053000 | 0.109564000  | -0.032299000 | 9                                                              | -2.664782000 | -1.503716000 | -0.000220000 |
| 6                                              | -2.671366000 | 0.901753000  | 0.583428000  |                                                                |              |              |              |
| 6                                              | -2.078762000 | -1.116502000 | -0.595842000 |                                                                |              |              |              |
| 6                                              | -3.999924000 | 0.483183000  | 0.632944000  |                                                                |              |              |              |
| 6                                              | -3.406956000 | -1.535676000 | -0.545175000 |                                                                |              |              |              |
| 6                                              | -4.373523000 | -0.737468000 | 0.068662000  |                                                                |              |              |              |
| 1                                              | -2.386867000 | 1.840044000  | 1.050332000  |                                                                |              |              |              |
| 1                                              | -1.339646000 | -1.733936000 | -1.097201000 |                                                                |              |              |              |
| 1                                              | -4.742405000 | 1.107600000  | 1.121445000  |                                                                |              |              |              |
| 1                                              | -3.688264000 | -2.484200000 | -0.993315000 |                                                                |              |              |              |
| 1                                              | -5.408440000 | -1.064103000 | 0.107688000  |                                                                |              |              |              |
| m- Cl, $E_{scf} = -880.4286437$                |              |              |              | m- Br, $E_{scf} = -2991.9374814$                               |              |              |              |
| 6                                              | 0.827704000  | 1.580417000  | 0.000333000  | 6                                                              | 1.648786000  | 1.576407000  | 0.000451000  |
| 6                                              | -0.432471000 | 2.171350000  | 0.000337000  | 6                                                              | 0.486328000  | 2.341966000  | 0.000390000  |
| 6                                              | -1.584017000 | 1.381533000  | 0.000128000  | 6                                                              | -0.766226000 | 1.724290000  | 0.000167000  |
| 6                                              | -1.454979000 | -0.007745000 | -0.000072000 | 6                                                              | -0.837353000 | 0.331727000  | 0.000009000  |
| 6                                              | -0.205159000 | -0.619937000 | -0.000057000 | 6                                                              | 0.311301000  | -0.452572000 | 0.000078000  |
| 6                                              | 0.941760000  | 0.184799000  | 0.000151000  | 6                                                              | 1.562326000  | 0.178648000  | 0.000304000  |
| 6                                              | 2.309825000  | -0.403452000 | 0.000162000  | 6                                                              | 2.831040000  | -0.600271000 | 0.000367000  |
| 8                                              | 2.305150000  | -1.759198000 | -0.000038000 | 8                                                              | 2.630355000  | -1.941217000 | -0.000034000 |
| 8                                              | 3.338712000  | 0.241283000  | -0.000070000 | 8                                                              | 3.942233000  | -0.110715000 | -0.000053000 |
| 1                                              | 1.733246000  | 2.176304000  | 0.000477000  | 1                                                              | 2.630399000  | 2.036573000  | 0.000596000  |
| 1                                              | -0.526901000 | 3.252649000  | 0.000498000  | 1                                                              | 0.547545000  | 3.425654000  | 0.000512000  |
| 1                                              | -2.569761000 | 1.833150000  | 0.000120000  | 1                                                              | -1.675724000 | 2.314091000  | 0.000113000  |
| 1                                              | -0.119407000 | -1.698995000 | -0.000197000 | 1                                                              | 0.243241000  | -1.532618000 | -0.000031000 |
| 1                                              | 3.238477000  | -2.028873000 | -0.000211000 | 1                                                              | 3.514966000  | -2.342788000 | -0.000302000 |
| 17                                             | -2.901325000 | -1.006629000 | -0.000336000 | 35                                                             | -2.550238000 | -0.516761000 | -0.000308000 |
| m- OCH <sub>3</sub> , $E_{scf} = -535.3610865$ |              |              |              | m- OCH <sub>2</sub> CH <sub>3</sub> , $E_{scf} = -574.6832523$ |              |              |              |
| 6                                              | 0.346787000  | -0.498102000 | 0.000140000  | 6                                                              | -0.009354000 | -0.319632000 | 0.000007000  |
| 6                                              | 1.521846000  | 0.253887000  | 0.000208000  | 6                                                              | 0.994523000  | 0.650039000  | 0.000100000  |
| 6                                              | 1.450428000  | 1.656987000  | 0.000039000  | 6                                                              | 0.644817000  | 2.011058000  | 0.000010000  |
| 6                                              | 0.215243000  | 2.294120000  | -0.000199000 | 6                                                              | -0.692226000 | 2.390582000  | -0.000169000 |
| 6                                              | -0.968571000 | 1.552596000  | -0.000275000 | 6                                                              | -1.705655000 | 1.429300000  | -0.000263000 |
| 6                                              | -0.894422000 | 0.156917000  | -0.000101000 | 6                                                              | -1.355773000 | 0.076074000  | -0.000175000 |
| 6                                              | -2.109885000 | -0.700092000 | -0.000163000 | 6                                                              | -2.376374000 | -1.005593000 | -0.000266000 |
| 8                                              | -3.265923000 | 0.010921000  | -0.000579000 | 8                                                              | -3.650967000 | -0.539110000 | -0.000431000 |
| 8                                              | -2.104842000 | -1.916057000 | -0.000147000 | 8                                                              | -2.129663000 | -2.196343000 | -0.000197000 |
| 1                                              | 0.349957000  | -1.580409000 | 0.000267000  | 1                                                              | 0.207466000  | -1.379851000 | 0.000071000  |
| 1                                              | 2.377885000  | 2.220196000  | 0.000099000  | 1                                                              | 1.441815000  | 2.747434000  | 0.000085000  |
| 1                                              | 0.174068000  | 3.379097000  | -0.000330000 | 1                                                              | -0.947587000 | 3.445923000  | -0.000237000 |
| 1                                              | -1.933680000 | 2.043944000  | -0.000465000 | 1                                                              | -2.748972000 | 1.719881000  | -0.000402000 |
| 1                                              | -3.978414000 | -0.649279000 | -0.000700000 | 1                                                              | -4.217542000 | -1.328097000 | -0.000474000 |
| 8                                              | 2.779078000  | -0.272996000 | 0.000438000  | 8                                                              | 2.330336000  | 0.383053000  | 0.000283000  |

|                                                                         |              |              |              |                                                                       |              |              |              |
|-------------------------------------------------------------------------|--------------|--------------|--------------|-----------------------------------------------------------------------|--------------|--------------|--------------|
| 6                                                                       | 2.911930000  | -1.687790000 | 0.000601000  | 6                                                                     | 2.755984000  | -0.982039000 | 0.000379000  |
| 1                                                                       | 2.459601000  | -2.135874000 | 0.893992000  | 1                                                                     | 2.360940000  | -1.495049000 | -0.887246000 |
| 1                                                                       | 2.459833000  | -2.136055000 | -0.892817000 | 1                                                                     | 2.360717000  | -1.494992000 | 0.887940000  |
| 1                                                                       | 3.984119000  | -1.887702000 | 0.000761000  | 6                                                                     | 4.273708000  | -0.987028000 | 0.000571000  |
|                                                                         |              |              |              | 1                                                                     | 4.661337000  | -0.478130000 | 0.887349000  |
|                                                                         |              |              |              | 1                                                                     | 4.661562000  | -0.478192000 | -0.886143000 |
|                                                                         |              |              |              | 1                                                                     | 4.644708000  | -2.016295000 | 0.000655000  |
| m- OCH(CH <sub>3</sub> ) <sub>2</sub> , E <sub>scf</sub> = -614.0026931 |              |              |              | m- CONH <sub>2</sub> , E <sub>scf</sub> = -589.5427289                |              |              |              |
| 6                                                                       | 0.232382000  | -0.209639000 | -0.090063000 | 6                                                                     | -0.020016000 | -0.520482000 | -0.035364000 |
| 6                                                                       | -0.700557000 | 0.827484000  | -0.023767000 | 6                                                                     | -1.219050000 | 0.193963000  | 0.002194000  |
| 6                                                                       | -0.248199000 | 2.152557000  | 0.103517000  | 6                                                                     | -1.178891000 | 1.594607000  | 0.055919000  |
| 6                                                                       | 1.112571000  | 2.430719000  | 0.156952000  | 6                                                                     | 0.040229000  | 2.266880000  | 0.095314000  |
| 6                                                                       | 2.053302000  | 1.401081000  | 0.087013000  | 6                                                                     | 1.236850000  | 1.550942000  | 0.070146000  |
| 6                                                                       | 1.603603000  | 0.083369000  | -0.036243000 | 6                                                                     | 1.207246000  | 0.152200000  | 0.000228000  |
| 6                                                                       | 2.541799000  | -1.067975000 | -0.111825000 | 6                                                                     | 2.445586000  | -0.670342000 | -0.042215000 |
| 8                                                                       | 3.847053000  | -0.698877000 | -0.061792000 | 8                                                                     | 3.579200000  | 0.073061000  | -0.017415000 |
| 8                                                                       | 2.208950000  | -2.233631000 | -0.209024000 | 8                                                                     | 2.469282000  | -1.884505000 | -0.091535000 |
| 1                                                                       | -0.056891000 | -1.248223000 | -0.180908000 | 1                                                                     | 0.003695000  | -1.601560000 | -0.121118000 |
| 1                                                                       | -0.988423000 | 2.944358000  | 0.154213000  | 1                                                                     | -2.121669000 | 2.130804000  | 0.062782000  |
| 1                                                                       | 1.443371000  | 3.460438000  | 0.253444000  | 1                                                                     | 0.060092000  | 3.351184000  | 0.143099000  |
| 1                                                                       | 3.114883000  | 1.610905000  | 0.129009000  | 1                                                                     | 2.190255000  | 2.065688000  | 0.098914000  |
| 1                                                                       | 4.353859000  | -1.525570000 | -0.118387000 | 1                                                                     | 4.313489000  | -0.562330000 | -0.047735000 |
| 8                                                                       | -2.053201000 | 0.678576000  | -0.085819000 | 6                                                                     | -2.577565000 | -0.454400000 | -0.036485000 |
| 6                                                                       | -2.643856000 | -0.633651000 | -0.192485000 | 8                                                                     | -3.587035000 | 0.189587000  | -0.295043000 |
| 1                                                                       | -2.051429000 | -1.232109000 | -0.896856000 | 7                                                                     | -2.619529000 | -1.801279000 | 0.210382000  |
| 6                                                                       | -4.032372000 | -0.409591000 | -0.779070000 | 1                                                                     | -3.540848000 | -2.207327000 | 0.280509000  |
| 1                                                                       | -3.964878000 | 0.084724000  | -1.751695000 | 1                                                                     | -1.866217000 | -2.272856000 | 0.684400000  |
| 1                                                                       | -4.630157000 | 0.220128000  | -0.112929000 |                                                                       |              |              |              |
| 1                                                                       | -4.549115000 | -1.365241000 | -0.908631000 |                                                                       |              |              |              |
| 6                                                                       | -2.684018000 | -1.316259000 | 1.174090000  |                                                                       |              |              |              |
| 1                                                                       | -3.133219000 | -2.310865000 | 1.088665000  |                                                                       |              |              |              |
| 1                                                                       | -1.683221000 | -1.431914000 | 1.597579000  |                                                                       |              |              |              |
| 1                                                                       | -3.285127000 | -0.723748000 | 1.870855000  |                                                                       |              |              |              |
| m- OH, E <sub>scf</sub> = -496.0560253                                  |              |              |              | m- NH <sub>2</sub> , E <sub>scf</sub> = -476.1942831                  |              |              |              |
| 6                                                                       | -0.453049000 | -0.858381000 | -0.000128000 | 6                                                                     | 0.453109000  | -0.843244000 | -0.009438000 |
| 6                                                                       | -1.791389000 | -0.468357000 | -0.000170000 | 6                                                                     | 1.797873000  | -0.449038000 | -0.009429000 |
| 6                                                                       | -2.122262000 | 0.893342000  | -0.000030000 | 6                                                                     | 2.091606000  | 0.927153000  | -0.001161000 |
| 6                                                                       | -1.111664000 | 1.851258000  | 0.000148000  | 6                                                                     | 1.068566000  | 1.872141000  | 0.005959000  |
| 6                                                                       | 0.231903000  | 1.474014000  | 0.000190000  | 6                                                                     | -0.268980000 | 1.479894000  | 0.004593000  |
| 6                                                                       | 0.556272000  | 0.112454000  | 0.000052000  | 6                                                                     | -0.568267000 | 0.111010000  | -0.002996000 |
| 6                                                                       | 1.962911000  | -0.370235000 | 0.000092000  | 6                                                                     | -1.967950000 | -0.391733000 | 0.001332000  |
| 8                                                                       | 2.872901000  | 0.635711000  | 0.000209000  | 8                                                                     | -2.893274000 | 0.602091000  | -0.001546000 |
| 8                                                                       | 2.296240000  | -1.539460000 | 0.000012000  | 8                                                                     | -2.289394000 | -1.564412000 | 0.007566000  |
| 1                                                                       | -0.167433000 | -1.906630000 | -0.000227000 | 1                                                                     | 0.180632000  | -1.894033000 | -0.016776000 |
| 1                                                                       | -3.169652000 | 1.176331000  | -0.000063000 | 1                                                                     | 3.129608000  | 1.250758000  | -0.004878000 |
| 1                                                                       | -1.376434000 | 2.904228000  | 0.000258000  | 1                                                                     | 1.321714000  | 2.928246000  | 0.014177000  |
| 1                                                                       | 1.019042000  | 2.217780000  | 0.000325000  | 1                                                                     | -1.066703000 | 2.211995000  | 0.011298000  |
| 1                                                                       | 3.742363000  | 0.202527000  | 0.000225000  | 1                                                                     | -3.755043000 | 0.153972000  | 0.001268000  |
| 8                                                                       | -2.821876000 | -1.363529000 | -0.000349000 | 7                                                                     | 2.819035000  | -1.395971000 | -0.074519000 |
| 1                                                                       | -2.462333000 | -2.260578000 | -0.000419000 | 1                                                                     | 2.569439000  | -2.321403000 | 0.245644000  |
|                                                                         |              |              |              | 1                                                                     | 3.712713000  | -1.096270000 | 0.289586000  |
| m- NHCH <sub>3</sub> , E <sub>scf</sub> = -515.5031016                  |              |              |              | m- N(CH <sub>3</sub> ) <sub>2</sub> , E <sub>scf</sub> = -554.8093315 |              |              |              |
| 6                                                                       | -0.339039000 | -0.474408000 | -0.042824000 | 6                                                                     | -0.054446000 | -0.511191000 | -0.001998000 |
| 6                                                                       | -1.517504000 | 0.287296000  | -0.050023000 | 6                                                                     | 1.173789000  | 0.181493000  | -0.003089000 |
| 6                                                                       | -1.401448000 | 1.693454000  | -0.011027000 | 6                                                                     | 1.123241000  | 1.596302000  | -0.001351000 |

|                                                      |              |              |              |                                                      |              |              |              |
|------------------------------------------------------|--------------|--------------|--------------|------------------------------------------------------|--------------|--------------|--------------|
| 6                                                    | -0.155273000 | 2.307096000  | 0.028336000  | 6                                                    | -0.095337000 | 2.269884000  | 0.000138000  |
| 6                                                    | 1.016754000  | 1.548910000  | 0.027875000  | 6                                                    | -1.304825000 | 1.579346000  | 0.000481000  |
| 6                                                    | 0.911685000  | 0.154258000  | -0.008927000 | 6                                                    | -1.268986000 | 0.179230000  | -0.000506000 |
| 6                                                    | 2.110687000  | -0.725603000 | -0.005581000 | 6                                                    | -2.510267000 | -0.640016000 | 0.000347000  |
| 8                                                    | 3.280728000  | -0.036530000 | 0.030306000  | 8                                                    | -3.644624000 | 0.107506000  | 0.001898000  |
| 8                                                    | 2.087083000  | -1.941275000 | -0.031593000 | 8                                                    | -2.548931000 | -1.855770000 | -0.000265000 |
| 1                                                    | -0.363120000 | -1.556708000 | -0.063816000 | 1                                                    | -0.096142000 | -1.592143000 | -0.002247000 |
| 1                                                    | -2.304378000 | 2.299853000  | -0.017079000 | 1                                                    | 2.039150000  | 2.174440000  | -0.001222000 |
| 1                                                    | -0.097734000 | 3.391234000  | 0.059162000  | 1                                                    | -0.094206000 | 3.356180000  | 0.001250000  |
| 1                                                    | 1.989841000  | 2.022721000  | 0.057524000  | 1                                                    | -2.252098000 | 2.103545000  | 0.001766000  |
| 1                                                    | 3.978597000  | -0.712058000 | 0.027875000  | 1                                                    | -4.375263000 | -0.532421000 | 0.002255000  |
| 7                                                    | -2.773650000 | -0.296764000 | -0.127620000 | 7                                                    | 2.379873000  | -0.496949000 | -0.006192000 |
| 1                                                    | -3.529504000 | 0.296171000  | 0.181532000  | 6                                                    | 3.628416000  | 0.241104000  | 0.004026000  |
| 6                                                    | -2.973268000 | -1.715334000 | 0.098888000  | 1                                                    | 3.731923000  | 0.888325000  | -0.878282000 |
| 1                                                    | -4.042812000 | -1.930600000 | 0.050501000  | 1                                                    | 3.728202000  | 0.873742000  | 0.897574000  |
| 1                                                    | -2.482631000 | -2.303405000 | -0.684053000 | 1                                                    | 4.461369000  | -0.462590000 | -0.000409000 |
| 1                                                    | -2.590769000 | -2.061428000 | 1.071698000  | 6                                                    | 2.395043000  | -1.948956000 | 0.001839000  |
|                                                      |              |              |              | 1                                                    | 3.428662000  | -2.296359000 | -0.004329000 |
|                                                      |              |              |              | 1                                                    | 1.905157000  | -2.361653000 | 0.894569000  |
|                                                      |              |              |              | 1                                                    | 1.892815000  | -2.369477000 | -0.879961000 |
| m- NHOH, $E_{\text{scf}} = -551.3537398$             |              |              |              | m- NO <sub>2</sub> , $E_{\text{scf}} = -625.3325257$ |              |              |              |
| 6                                                    | -0.340396000 | -0.504152000 | 0.061843000  | 6                                                    | -0.031891000 | -0.565456000 | -0.000032000 |
| 6                                                    | -1.526236000 | 0.232183000  | 0.065852000  | 6                                                    | -1.228186000 | 0.140177000  | -0.000141000 |
| 6                                                    | -1.468245000 | 1.634610000  | 0.016312000  | 6                                                    | -1.270729000 | 1.534184000  | -0.000013000 |
| 6                                                    | -0.238010000 | 2.285095000  | -0.028945000 | 6                                                    | -0.068984000 | 2.238996000  | 0.000227000  |
| 6                                                    | 0.951371000  | 1.557377000  | -0.031632000 | 6                                                    | 1.147125000  | 1.555259000  | 0.000332000  |
| 6                                                    | 0.891046000  | 0.158920000  | 0.012553000  | 6                                                    | 1.167255000  | 0.153398000  | 0.000208000  |
| 6                                                    | 2.118220000  | -0.682615000 | 0.008979000  | 6                                                    | 2.438956000  | -0.624977000 | 0.000337000  |
| 8                                                    | 3.263138000  | 0.044880000  | -0.058648000 | 8                                                    | 3.538120000  | 0.167029000  | 0.000242000  |
| 8                                                    | 2.133196000  | -1.896612000 | 0.061643000  | 8                                                    | 2.504623000  | -1.835975000 | 0.000101000  |
| 1                                                    | -0.363076000 | -1.585429000 | 0.079991000  | 1                                                    | -0.023734000 | -1.647855000 | -0.000125000 |
| 1                                                    | -2.389439000 | 2.212391000  | 0.019276000  | 1                                                    | -2.230346000 | 2.035580000  | -0.000104000 |
| 1                                                    | -0.209774000 | 3.369819000  | -0.068239000 | 1                                                    | -0.081699000 | 3.323846000  | 0.000331000  |
| 1                                                    | 1.910548000  | 2.058638000  | -0.070438000 | 1                                                    | 2.083520000  | 2.100689000  | 0.000516000  |
| 1                                                    | 3.984701000  | -0.605333000 | -0.052415000 | 1                                                    | 4.301883000  | -0.433687000 | 0.000165000  |
| 7                                                    | -2.788592000 | -0.389071000 | 0.205130000  | 7                                                    | -2.498513000 | -0.609354000 | -0.000397000 |
| 1                                                    | -3.503805000 | 0.101591000  | -0.326581000 | 8                                                    | -3.541941000 | 0.042867000  | -0.000396000 |
| 8                                                    | -2.800394000 | -1.732419000 | -0.274227000 | 8                                                    | -2.435966000 | -1.836744000 | -0.000386000 |
| 1                                                    | -3.003032000 | -2.243490000 | 0.522585000  |                                                      |              |              |              |
| m- CF <sub>3</sub> , $E_{\text{scf}} = -757.8701384$ |              |              |              | m- CHO, $E_{\text{scf}} = -534.1585679$              |              |              |              |
| 6                                                    | -0.276297000 | -0.453271000 | -0.023944000 | 6                                                    | 0.195023000  | -0.736237000 | 0.000103000  |
| 6                                                    | 0.903467000  | 0.289896000  | -0.033066000 | 6                                                    | 1.479550000  | -0.190206000 | 0.000148000  |
| 6                                                    | 0.859140000  | 1.687303000  | -0.022408000 | 6                                                    | 1.647193000  | 1.204180000  | -0.000032000 |
| 6                                                    | -0.371259000 | 2.343813000  | -0.001764000 | 6                                                    | 0.534777000  | 2.039052000  | -0.000252000 |
| 6                                                    | -1.553346000 | 1.608398000  | 0.008666000  | 6                                                    | -0.751318000 | 1.492421000  | -0.000305000 |
| 6                                                    | -1.509015000 | 0.208582000  | -0.002943000 | 6                                                    | -0.925259000 | 0.101878000  | -0.000131000 |
| 6                                                    | -2.801912000 | -0.530226000 | 0.002358000  | 6                                                    | -2.270982000 | -0.533933000 | -0.000176000 |
| 8                                                    | -2.642027000 | -1.875760000 | -0.012514000 | 8                                                    | -3.283032000 | 0.367848000  | -0.000416000 |
| 8                                                    | -3.896600000 | -0.005216000 | 0.018807000  | 8                                                    | -2.468112000 | -1.732196000 | -0.000059000 |
| 1                                                    | -0.241434000 | -1.535342000 | -0.040346000 | 1                                                    | 0.044051000  | -1.811955000 | 0.000241000  |
| 1                                                    | 1.784213000  | 2.253349000  | -0.039510000 | 1                                                    | 2.656987000  | 1.602062000  | 0.000005000  |
| 1                                                    | -0.405356000 | 3.428466000  | 0.002243000  | 1                                                    | 0.661790000  | 3.117087000  | -0.000386000 |
| 1                                                    | -2.522037000 | 2.095855000  | 0.022704000  | 1                                                    | -1.622189000 | 2.137961000  | -0.000477000 |
| 1                                                    | -3.537854000 | -2.251666000 | -0.007422000 | 1                                                    | -4.103547000 | -0.152457000 | -0.000445000 |
| 6                                                    | 2.235123000  | -0.413240000 | 0.000189000  | 6                                                    | 2.662848000  | -1.084032000 | 0.000380000  |
| 9                                                    | 2.170807000  | -1.641128000 | -0.557363000 | 8                                                    | 3.814732000  | -0.695863000 | 0.000783000  |

|                                                    |              |              |              |                                                        |              |              |              |
|----------------------------------------------------|--------------|--------------|--------------|--------------------------------------------------------|--------------|--------------|--------------|
| 9                                                  | 3.184558000  | 0.286402000  | -0.660474000 | 1                                                      | 2.423219000  | -2.169747000 | 0.000197000  |
| 9                                                  | 2.679756000  | -0.577538000 | 1.267777000  |                                                        |              |              |              |
| m- CN, $E_{\text{scf}} = -513.0749293$             |              |              |              | m- COCH <sub>3</sub> , $E_{\text{scf}} = -573.4848152$ |              |              |              |
| 6                                                  | -0.312965000 | -0.641897000 | -0.000166000 | 6                                                      | 0.030483000  | -0.498438000 | 0.000026000  |
| 6                                                  | -1.575465000 | -0.032316000 | -0.000177000 | 6                                                      | 1.217919000  | 0.238174000  | 0.000009000  |
| 6                                                  | -1.683239000 | 1.369596000  | 0.000035000  | 6                                                      | 1.151708000  | 1.641466000  | -0.000008000 |
| 6                                                  | -0.531773000 | 2.153014000  | 0.000253000  | 6                                                      | -0.077890000 | 2.292702000  | -0.000007000 |
| 6                                                  | 0.724380000  | 1.550141000  | 0.000262000  | 6                                                      | -1.261674000 | 1.553380000  | 0.000004000  |
| 6                                                  | 0.835815000  | 0.153671000  | 0.000049000  | 6                                                      | -1.208402000 | 0.153633000  | 0.000020000  |
| 6                                                  | 2.204754000  | -0.435667000 | 0.000059000  | 6                                                      | -2.433990000 | -0.689630000 | -0.000009000 |
| 8                                                  | 2.195667000  | -1.789373000 | 0.000073000  | 8                                                      | -3.578783000 | 0.037251000  | 0.000023000  |
| 8                                                  | 3.231507000  | 0.211617000  | 0.000408000  | 8                                                      | -2.438801000 | -1.904614000 | -0.000054000 |
| 1                                                  | -0.229461000 | -1.721790000 | -0.000328000 | 1                                                      | 0.031549000  | -1.582384000 | 0.000082000  |
| 1                                                  | -2.665795000 | 1.829150000  | 0.000026000  | 1                                                      | 2.084709000  | 2.194969000  | -0.000037000 |
| 1                                                  | -0.615493000 | 3.234856000  | 0.000415000  | 1                                                      | -0.118719000 | 3.377520000  | 0.000010000  |
| 1                                                  | 1.633433000  | 2.141375000  | 0.000426000  | 1                                                      | -2.224112000 | 2.052036000  | 0.000008000  |
| 1                                                  | 3.126992000  | -2.066794000 | 0.000239000  | 1                                                      | -4.303611000 | -0.609632000 | -0.000007000 |
| 6                                                  | -2.760885000 | -0.841101000 | -0.000403000 | 6                                                      | 2.574768000  | -0.407725000 | 0.000023000  |
| 7                                                  | -3.724401000 | -1.492485000 | -0.000586000 | 8                                                      | 3.583649000  | 0.280181000  | -0.000035000 |
|                                                    |              |              |              | 6                                                      | 2.664437000  | -1.922606000 | 0.000034000  |
|                                                    |              |              |              | 1                                                      | 2.170882000  | -2.345547000 | 0.881784000  |
|                                                    |              |              |              | 1                                                      | 2.170655000  | -2.345370000 | -0.881703000 |
|                                                    |              |              |              | 1                                                      | 3.715967000  | -2.209875000 | -0.000157000 |
| m-CH <sub>2</sub> F, $E_{\text{scf}} = -559.37796$ |              |              |              |                                                        |              |              |              |
| 6                                                  | 0.346197000  | -0.487518000 | 0.000280000  |                                                        |              |              |              |
| 6                                                  | 1.524030000  | 0.255243000  | 0.000254000  |                                                        |              |              |              |
| 6                                                  | 1.452088000  | 1.654697000  | 0.000010000  |                                                        |              |              |              |
| 6                                                  | 0.217213000  | 2.301256000  | -0.000170000 |                                                        |              |              |              |
| 6                                                  | -0.962817000 | 1.558437000  | -0.000154000 |                                                        |              |              |              |
| 6                                                  | -0.896566000 | 0.160239000  | 0.000061000  |                                                        |              |              |              |
| 6                                                  | -2.119117000 | -0.687770000 | 0.000089000  |                                                        |              |              |              |
| 8                                                  | -3.268131000 | 0.036249000  | -0.000335000 |                                                        |              |              |              |
| 8                                                  | -2.124584000 | -1.902313000 | 0.000434000  |                                                        |              |              |              |
| 1                                                  | 0.378628000  | -1.569990000 | 0.000416000  |                                                        |              |              |              |
| 1                                                  | 2.366823000  | 2.243684000  | -0.000069000 |                                                        |              |              |              |
| 1                                                  | 0.174662000  | 3.386115000  | -0.000372000 |                                                        |              |              |              |
| 1                                                  | -1.927338000 | 2.052228000  | -0.000336000 |                                                        |              |              |              |
| 1                                                  | -3.987867000 | -0.616117000 | -0.000255000 |                                                        |              |              |              |
| 6                                                  | 2.872215000  | -0.426420000 | 0.000714000  |                                                        |              |              |              |
| 1                                                  | 3.452175000  | -0.138441000 | -0.886212000 |                                                        |              |              |              |
| 1                                                  | 3.450433000  | -0.140692000 | 0.889512000  |                                                        |              |              |              |
| 9                                                  | 2.737193000  | -1.806362000 | -0.001109000 |                                                        |              |              |              |



**Table S5** B3LYP/6-31G(d,p) optimized geometries of para substituted benzoic acids. SCF energy (in a.u.) is also provided

|                                                                       |              |              |              |                                                                      |              |              |              |
|-----------------------------------------------------------------------|--------------|--------------|--------------|----------------------------------------------------------------------|--------------|--------------|--------------|
| p-CH <sub>3</sub> E <sub>scf</sub> = -460.156802                      |              |              |              | p-CH <sub>2</sub> CH <sub>3</sub> , E <sub>scf</sub> = -499.4714995  |              |              |              |
| 6                                                                     | -0.023138000 | 1.228246000  | -0.003994000 | 6                                                                    | -0.312737000 | -1.130341000 | -0.000009000 |
| 6                                                                     | -1.412957000 | 1.202507000  | -0.010366000 | 6                                                                    | 1.070460000  | -0.964584000 | -0.000027000 |
| 6                                                                     | -2.112985000 | -0.013480000 | -0.010579000 | 6                                                                    | 1.642841000  | 0.314124000  | -0.000043000 |
| 6                                                                     | -1.375000000 | -1.205683000 | -0.010640000 | 6                                                                    | 0.781305000  | 1.424531000  | -0.000035000 |
| 6                                                                     | 0.016849000  | -1.190831000 | -0.004367000 | 6                                                                    | -0.599056000 | 1.269976000  | -0.000017000 |
| 6                                                                     | 0.703788000  | 0.030456000  | -0.000362000 | 6                                                                    | -1.158815000 | -0.016808000 | -0.000006000 |
| 6                                                                     | 2.185606000  | 0.110879000  | 0.003135000  | 6                                                                    | -2.624376000 | -0.248465000 | 0.000009000  |
| 8                                                                     | 2.786653000  | -1.107850000 | 0.004830000  | 8                                                                    | -3.346478000 | 0.903053000  | 0.000032000  |
| 8                                                                     | 2.828973000  | 1.142472000  | 0.005092000  | 8                                                                    | -3.159891000 | -1.340009000 | -0.000004000 |
| 1                                                                     | -1.967193000 | 2.137418000  | -0.017047000 | 1                                                                    | 1.705556000  | -1.843786000 | -0.000028000 |
| 1                                                                     | -1.899793000 | -2.157440000 | -0.017478000 | 1                                                                    | 1.206260000  | 2.425506000  | -0.000042000 |
| 1                                                                     | 0.574968000  | -2.120132000 | -0.006364000 | 1                                                                    | -1.248996000 | 2.137555000  | -0.000011000 |
| 1                                                                     | 3.740987000  | -0.927038000 | 0.007510000  | 1                                                                    | -4.277246000 | 0.625408000  | 0.000029000  |
| 1                                                                     | 0.521500000  | 2.166305000  | -0.005448000 | 1                                                                    | -0.756469000 | -2.120201000 | 0.000000000  |
| 6                                                                     | -3.621802000 | -0.036888000 | 0.015323000  | 6                                                                    | 3.143686000  | 0.548245000  | -0.000089000 |
| 1                                                                     | -3.995888000 | -0.016002000 | 1.046575000  | 1                                                                    | 3.393219000  | 1.167289000  | -0.872513000 |
| 1                                                                     | -4.044756000 | 0.830139000  | -0.500387000 | 1                                                                    | 3.393223000  | 1.167639000  | 0.872082000  |
| 1                                                                     | -4.016999000 | -0.941469000 | -0.455641000 | 6                                                                    | 4.029958000  | -0.698929000 | 0.000154000  |
|                                                                       |              |              |              | 1                                                                    | 3.855114000  | -1.319050000 | -0.884929000 |
|                                                                       |              |              |              | 1                                                                    | 3.855075000  | -1.318729000 | 0.885454000  |
|                                                                       |              |              |              | 1                                                                    | 5.085617000  | -0.412484000 | 0.000121000  |
| p-CH(CH <sub>3</sub> ) <sub>2</sub> , E <sub>scf</sub> = -538.7888479 |              |              |              | p-C(CH <sub>3</sub> ) <sub>3</sub> , E <sub>scf</sub> = -578.1020706 |              |              |              |
| 6                                                                     | 0.678008000  | -1.157515000 | -0.000158000 | 6                                                                    | 1.045357000  | -1.218962000 | -0.000014000 |
| 6                                                                     | -0.705827000 | -1.033187000 | -0.000103000 | 6                                                                    | -0.342448000 | -1.187930000 | -0.000014000 |
| 6                                                                     | -1.319792000 | 0.230470000  | 0.000068000  | 6                                                                    | -1.052901000 | 0.027529000  | -0.000013000 |
| 6                                                                     | -0.495938000 | 1.364288000  | 0.000184000  | 6                                                                    | -0.303053000 | 1.212744000  | -0.000028000 |
| 6                                                                     | 0.892293000  | 1.251619000  | 0.000129000  | 6                                                                    | 1.091156000  | 1.193321000  | -0.000027000 |
| 6                                                                     | 1.489913000  | -0.014718000 | -0.000043000 | 6                                                                    | 1.778387000  | -0.024467000 | -0.000013000 |
| 6                                                                     | 2.962299000  | -0.201430000 | -0.000107000 | 6                                                                    | 3.259819000  | -0.108007000 | 0.000006000  |
| 8                                                                     | 3.649247000  | 0.971001000  | 0.000036000  | 8                                                                    | 3.863767000  | 1.109251000  | 0.000018000  |
| 8                                                                     | 3.529953000  | -1.276586000 | -0.000212000 | 8                                                                    | 3.900655000  | -1.141220000 | 0.000014000  |
| 1                                                                     | -1.317654000 | -1.930754000 | -0.000194000 | 1                                                                    | -0.883140000 | -2.129246000 | -0.000023000 |
| 1                                                                     | -0.950916000 | 2.351445000  | 0.000320000  | 1                                                                    | -0.803845000 | 2.173456000  | -0.000054000 |
| 1                                                                     | 1.514829000  | 2.139073000  | 0.000219000  | 1                                                                    | 1.647531000  | 2.123821000  | -0.000038000 |
| 1                                                                     | 4.588070000  | 0.721950000  | 0.000007000  | 1                                                                    | 4.817661000  | 0.926081000  | 0.000032000  |
| 1                                                                     | 1.154202000  | -2.132128000 | -0.000288000 | 1                                                                    | 1.584482000  | -2.160267000 | -0.000013000 |
| 6                                                                     | -2.834859000 | 0.373450000  | 0.000121000  | 6                                                                    | -2.591838000 | 0.014985000  | 0.000005000  |
| 1                                                                     | -3.056397000 | 1.448631000  | 0.000290000  | 6                                                                    | -3.097649000 | -0.722534000 | 1.262882000  |
| 6                                                                     | -3.465397000 | -0.228289000 | 1.270346000  | 6                                                                    | -3.097677000 | -0.722577000 | -1.262835000 |
| 6                                                                     | -3.465432000 | -0.227895000 | -1.270276000 | 1                                                                    | -2.758652000 | -0.218441000 | -2.173546000 |
| 1                                                                     | -3.044076000 | 0.222089000  | -2.174299000 | 1                                                                    | -2.743141000 | -1.756471000 | -1.301700000 |
| 1                                                                     | -3.297041000 | -1.308774000 | -1.325337000 | 1                                                                    | -4.192959000 | -0.745558000 | -1.274970000 |
| 1                                                                     | -4.547615000 | -0.059722000 | -1.277897000 | 1                                                                    | -2.743087000 | -1.756414000 | 1.301793000  |
| 1                                                                     | -3.297006000 | -1.309184000 | 1.325070000  | 1                                                                    | -4.192931000 | -0.745527000 | 1.275013000  |
| 1                                                                     | -4.547579000 | -0.060118000 | 1.278045000  | 1                                                                    | -2.758628000 | -0.218337000 | 2.173560000  |
| 1                                                                     | -3.044018000 | 0.221416000  | 2.174499000  | 6                                                                    | -3.191499000 | 1.433832000  | -0.000001000 |
|                                                                       |              |              |              | 1                                                                    | -2.895249000 | 2.002858000  | -0.887198000 |
|                                                                       |              |              |              | 1                                                                    | -4.284079000 | 1.369326000  | -0.000006000 |
|                                                                       |              |              |              | 1                                                                    | -2.895259000 | 2.002860000  | 0.887197000  |

|                                                                    |              |              |              |                                                                      |              |              |              |
|--------------------------------------------------------------------|--------------|--------------|--------------|----------------------------------------------------------------------|--------------|--------------|--------------|
| p- C <sub>6</sub> H <sub>5</sub> , E <sub>scf</sub> = -651.8995199 |              |              |              | p- F, E <sub>scf</sub> = -520.0676569                                |              |              |              |
| 6                                                                  | -1.663402000 | 1.191914000  | -0.321353000 | 6                                                                    | -0.068487000 | 1.230713000  | -0.000038000 |
| 6                                                                  | -0.274485000 | 1.180526000  | -0.319307000 | 6                                                                    | -1.458595000 | 1.216052000  | -0.000071000 |
| 6                                                                  | 0.439785000  | 0.010269000  | -0.002954000 | 6                                                                    | -2.108891000 | -0.015006000 | -0.000040000 |
| 6                                                                  | -0.292059000 | -1.148798000 | 0.311102000  | 6                                                                    | -1.418032000 | -1.223209000 | 0.000022000  |
| 6                                                                  | -1.682667000 | -1.143446000 | 0.309349000  | 6                                                                    | -0.026592000 | -1.195600000 | 0.000055000  |
| 6                                                                  | -2.380526000 | 0.029868000  | -0.007360000 | 6                                                                    | 0.655763000  | 0.029857000  | 0.000026000  |
| 6                                                                  | -3.863334000 | 0.095125000  | -0.025205000 | 6                                                                    | 2.137729000  | 0.112325000  | 0.000061000  |
| 8                                                                  | -4.453083000 | -1.085805000 | 0.295737000  | 8                                                                    | 2.737765000  | -1.105709000 | 0.000075000  |
| 8                                                                  | -4.514486000 | 1.085718000  | -0.294514000 | 8                                                                    | 2.777132000  | 1.145840000  | -0.000008000 |
| 1                                                                  | 0.268473000  | 2.080102000  | -0.591321000 | 1                                                                    | -2.041551000 | 2.130202000  | -0.000120000 |
| 1                                                                  | 0.237456000  | -2.055790000 | 0.585069000  | 1                                                                    | -1.971457000 | -2.155561000 | 0.000043000  |
| 1                                                                  | -2.232787000 | -2.042712000 | 0.561676000  | 1                                                                    | 0.535524000  | -2.122029000 | 0.000104000  |
| 1                                                                  | -5.409192000 | -0.920423000 | 0.250940000  | 1                                                                    | 3.692674000  | -0.927803000 | 0.000057000  |
| 1                                                                  | -2.215696000 | 2.090882000  | -0.572992000 | 1                                                                    | 0.479185000  | 2.166606000  | -0.000061000 |
| 6                                                                  | 1.923884000  | -0.000511000 | -0.000343000 | 9                                                                    | -3.454546000 | -0.038138000 | -0.000072000 |
| 6                                                                  | 2.638110000  | -1.120070000 | -0.460038000 |                                                                      |              |              |              |
| 6                                                                  | 2.652060000  | 1.109025000  | 0.461769000  |                                                                      |              |              |              |
| 6                                                                  | 4.031654000  | -1.129349000 | -0.458481000 |                                                                      |              |              |              |
| 6                                                                  | 4.045595000  | 1.098688000  | 0.465242000  |                                                                      |              |              |              |
| 6                                                                  | 4.741440000  | -0.020268000 | 0.004684000  |                                                                      |              |              |              |
| 1                                                                  | 2.095790000  | -1.977564000 | -0.846782000 |                                                                      |              |              |              |
| 1                                                                  | 2.120448000  | 1.974269000  | 0.846063000  |                                                                      |              |              |              |
| 1                                                                  | 4.563821000  | -2.001393000 | -0.827284000 |                                                                      |              |              |              |
| 1                                                                  | 4.588591000  | 1.963320000  | 0.835682000  |                                                                      |              |              |              |
| 1                                                                  | 5.827323000  | -0.027832000 | 0.006536000  |                                                                      |              |              |              |
| p- Cl, E <sub>scf</sub> = -880.4295115                             |              |              |              | p- Br, E <sub>scf</sub> = -2991.9382305                              |              |              |              |
| 6                                                                  | 0.372284000  | 1.232641000  | -0.000044000 | 6                                                                    | 1.062152000  | 1.235471000  | -0.000011000 |
| 6                                                                  | -1.018361000 | 1.223338000  | -0.000060000 | 6                                                                    | -0.328840000 | 1.229359000  | -0.000046000 |
| 6                                                                  | -1.685767000 | -0.003049000 | -0.000027000 | 6                                                                    | -0.998697000 | 0.005184000  | -0.000018000 |
| 6                                                                  | -0.988224000 | -1.211886000 | 0.000021000  | 6                                                                    | -0.305296000 | -1.205183000 | 0.000044000  |
| 6                                                                  | 0.403850000  | -1.190471000 | 0.000037000  | 6                                                                    | 1.087125000  | -1.188103000 | 0.000080000  |
| 6                                                                  | 1.091476000  | 0.030403000  | 0.000004000  | 6                                                                    | 1.777814000  | 0.031109000  | 0.000053000  |
| 6                                                                  | 2.575697000  | 0.106846000  | 0.000017000  | 6                                                                    | 3.262343000  | 0.103417000  | 0.000091000  |
| 8                                                                  | 3.169220000  | -1.113176000 | 0.000108000  | 8                                                                    | 3.852414000  | -1.118299000 | 0.000107000  |
| 8                                                                  | 3.216911000  | 1.138653000  | 0.000020000  | 8                                                                    | 3.906435000  | 1.133409000  | 0.000024000  |
| 1                                                                  | -1.582253000 | 2.149100000  | -0.000098000 | 1                                                                    | -0.888871000 | 2.157268000  | -0.000095000 |
| 1                                                                  | -1.529841000 | -2.150894000 | 0.000046000  | 1                                                                    | -0.848100000 | -2.143302000 | 0.000064000  |
| 1                                                                  | 0.959738000  | -2.120766000 | 0.000075000  | 1                                                                    | 1.640364000  | -2.120042000 | 0.000129000  |
| 1                                                                  | 4.125459000  | -0.942038000 | 0.000136000  | 1                                                                    | 4.809143000  | -0.949866000 | 0.000093000  |
| 1                                                                  | 0.921508000  | 2.167753000  | -0.000070000 | 1                                                                    | 1.613697000  | 2.169287000  | -0.000032000 |
| 17                                                                 | -3.440553000 | -0.025524000 | -0.000047000 | 35                                                                   | -2.906761000 | -0.014336000 | -0.000067000 |
| p-OCH <sub>3</sub> , E <sub>scf</sub> = -535.3627273               |              |              |              | p-OCH <sub>2</sub> CH <sub>3</sub> , E <sub>scf</sub> = -574.6849756 |              |              |              |
| 6                                                                  | -0.280358000 | -1.136857000 | -0.000027000 | 6                                                                    | -0.787772000 | -1.141332000 | 0.000011000  |
| 6                                                                  | 1.104497000  | -0.999246000 | 0.000000000  | 6                                                                    | 0.597704000  | -1.011381000 | 0.000000000  |
| 6                                                                  | 1.669140000  | 0.285111000  | 0.000011000  | 6                                                                    | 1.170390000  | 0.270064000  | -0.000042000 |
| 6                                                                  | 0.835959000  | 1.417001000  | -0.000007000 | 6                                                                    | 0.341949000  | 1.405926000  | -0.000075000 |
| 6                                                                  | -0.541019000 | 1.267176000  | -0.000033000 | 6                                                                    | -1.035771000 | 1.263790000  | -0.000065000 |
| 6                                                                  | -1.116879000 | -0.015456000 | -0.000045000 | 6                                                                    | -1.618693000 | -0.015661000 | -0.000022000 |
| 6                                                                  | -2.580342000 | -0.233873000 | -0.000078000 | 6                                                                    | -3.083051000 | -0.226206000 | -0.000013000 |
| 8                                                                  | -3.293212000 | 0.924529000  | 0.000012000  | 8                                                                    | -3.789977000 | 0.936059000  | 0.000049000  |
| 8                                                                  | -3.127799000 | -1.320570000 | -0.000024000 | 8                                                                    | -3.636775000 | -1.309823000 | 0.000082000  |
| 1                                                                  | 1.729180000  | -1.883997000 | 0.000010000  | 1                                                                    | 1.217223000  | -1.899557000 | 0.000023000  |
| 1                                                                  | 1.298285000  | 2.398240000  | 0.000001000  | 1                                                                    | 0.809327000  | 2.384806000  | -0.000108000 |
| 1                                                                  | -1.181824000 | 2.141349000  | -0.000045000 | 1                                                                    | -1.671715000 | 2.141533000  | -0.000089000 |

|                                                                        |              |              |              |                                                                      |              |              |              |
|------------------------------------------------------------------------|--------------|--------------|--------------|----------------------------------------------------------------------|--------------|--------------|--------------|
| 1                                                                      | -4.225862000 | 0.653710000  | 0.000043000  | 1                                                                    | -4.723919000 | 0.669780000  | 0.000107000  |
| 1                                                                      | -0.735555000 | -2.121482000 | -0.000038000 | 1                                                                    | -1.248158000 | -2.123569000 | 0.000041000  |
| 8                                                                      | 3.004032000  | 0.539838000  | 0.000036000  | 8                                                                    | 2.505580000  | 0.517552000  | -0.000056000 |
| 6                                                                      | 3.905880000  | -0.558897000 | 0.000096000  | 6                                                                    | 3.418161000  | -0.584181000 | 0.000021000  |
| 1                                                                      | 3.782187000  | -1.181993000 | 0.894279000  | 1                                                                    | 3.247433000  | -1.207575000 | -0.888253000 |
| 1                                                                      | 3.782294000  | -1.182003000 | -0.894095000 | 1                                                                    | 3.247367000  | -1.207507000 | 0.888329000  |
| 1                                                                      | 4.905868000  | -0.123948000 | 0.000153000  | 6                                                                    | 4.823390000  | -0.011078000 | 0.000050000  |
|                                                                        |              |              |              | 1                                                                    | 4.987905000  | 0.606952000  | 0.886833000  |
|                                                                        |              |              |              | 1                                                                    | 4.987963000  | 0.606897000  | -0.886761000 |
|                                                                        |              |              |              | 1                                                                    | 5.558109000  | -0.821711000 | 0.000098000  |
| p-OCH(CH <sub>3</sub> ) <sub>2</sub> , E <sub>scf</sub> = -614.0045326 |              |              |              | p-CONH <sub>2</sub> , E <sub>scf</sub> = -589.5417298                |              |              |              |
| 6                                                                      | 1.055006000  | -1.069650000 | -0.257719000 | 6                                                                    | 0.676276000  | 1.224580000  | -0.121586000 |
| 6                                                                      | -0.324068000 | -0.886012000 | -0.258169000 | 6                                                                    | -0.714128000 | 1.196639000  | -0.129560000 |
| 6                                                                      | -0.852344000 | 0.395617000  | -0.030907000 | 6                                                                    | -1.397452000 | -0.023750000 | -0.021812000 |
| 6                                                                      | 0.020923000  | 1.474066000  | 0.199628000  | 6                                                                    | -0.666981000 | -1.215085000 | 0.073283000  |
| 6                                                                      | 1.392176000  | 1.278868000  | 0.198897000  | 6                                                                    | 0.723163000  | -1.191040000 | 0.088248000  |
| 6                                                                      | 1.928209000  | -0.000058000 | -0.030969000 | 6                                                                    | 1.401818000  | 0.032335000  | -0.005755000 |
| 6                                                                      | 3.382336000  | -0.267829000 | -0.041292000 | 6                                                                    | 2.887631000  | 0.121196000  | 0.003891000  |
| 8                                                                      | 4.132695000  | 0.843671000  | 0.188506000  | 8                                                                    | 3.490513000  | -1.088339000 | 0.113107000  |
| 8                                                                      | 3.894968000  | -1.355099000 | -0.231569000 | 8                                                                    | 3.520315000  | 1.155240000  | -0.075222000 |
| 1                                                                      | -0.971183000 | -1.736511000 | -0.432285000 | 1                                                                    | 1.220729000  | 2.158171000  | -0.210990000 |
| 1                                                                      | -0.409274000 | 2.454685000  | 0.372531000  | 1                                                                    | -1.262960000 | 2.124952000  | -0.254911000 |
| 1                                                                      | 2.058943000  | 2.115021000  | 0.375815000  | 1                                                                    | -1.214373000 | -2.149204000 | 0.132457000  |
| 1                                                                      | 5.055326000  | 0.542154000  | 0.157699000  | 1                                                                    | 1.287718000  | -2.112524000 | 0.169974000  |
| 1                                                                      | 1.477542000  | -2.053511000 | -0.431913000 | 1                                                                    | 4.445501000  | -0.909995000 | 0.108121000  |
| 8                                                                      | -2.172823000 | 0.711453000  | -0.024179000 | 6                                                                    | -2.898983000 | -0.133905000 | -0.027768000 |
| 6                                                                      | -3.182825000 | -0.302820000 | -0.216110000 | 8                                                                    | -3.466067000 | -1.184773000 | -0.297321000 |
| 1                                                                      | -2.850050000 | -0.987501000 | -1.006685000 | 7                                                                    | -3.593188000 | 1.014431000  | 0.261634000  |
| 6                                                                      | -4.422581000 | 0.441490000  | -0.696041000 | 1                                                                    | -3.158944000 | 1.761455000  | 0.780311000  |
| 1                                                                      | -4.214136000 | 0.980610000  | -1.623745000 | 1                                                                    | -4.591504000 | 0.903280000  | 0.365447000  |
| 1                                                                      | -4.747986000 | 1.164797000  | 0.057798000  |                                                                      |              |              |              |
| 1                                                                      | -5.240760000 | -0.261876000 | -0.877483000 |                                                                      |              |              |              |
| 6                                                                      | -3.420104000 | -1.069631000 | 1.083911000  |                                                                      |              |              |              |
| 1                                                                      | -3.766294000 | -0.385026000 | 1.864303000  |                                                                      |              |              |              |
| 1                                                                      | -4.183339000 | -1.840502000 | 0.936970000  |                                                                      |              |              |              |
| 1                                                                      | -2.507886000 | -1.556774000 | 1.437546000  |                                                                      |              |              |              |
| p-OH, E <sub>scf</sub> = -496.0578549                                  |              |              |              | p-NH <sub>2</sub> , E <sub>scf</sub> = -476.1975078                  |              |              |              |
| 6                                                                      | -0.063050000 | 1.222751000  | 0.000176000  | 6                                                                    | -0.046683000 | 1.226414000  | -0.004107000 |
| 6                                                                      | -1.451454000 | 1.198434000  | 0.000219000  | 6                                                                    | -1.431662000 | 1.209703000  | -0.005871000 |
| 6                                                                      | -2.125145000 | -0.031024000 | 0.000063000  | 6                                                                    | -2.130557000 | -0.014565000 | -0.006393000 |
| 6                                                                      | -1.400880000 | -1.230868000 | -0.000133000 | 6                                                                    | -1.391974000 | -1.214539000 | -0.004948000 |
| 6                                                                      | -0.013392000 | -1.196987000 | -0.000172000 | 6                                                                    | -0.005349000 | -1.189244000 | -0.003461000 |
| 6                                                                      | 0.671242000  | 0.029203000  | -0.000018000 | 6                                                                    | 0.688752000  | 0.030914000  | -0.002331000 |
| 6                                                                      | 2.148252000  | 0.118860000  | -0.000058000 | 6                                                                    | 2.161877000  | 0.112267000  | 0.002970000  |
| 8                                                                      | 2.757502000  | -1.096746000 | -0.000212000 | 8                                                                    | 2.767631000  | -1.108020000 | 0.003625000  |
| 8                                                                      | 2.786968000  | 1.154411000  | 0.000047000  | 8                                                                    | 2.810618000  | 1.142845000  | 0.006703000  |
| 1                                                                      | 0.476550000  | 2.163578000  | 0.000292000  | 1                                                                    | 0.495447000  | 2.166059000  | -0.001464000 |
| 1                                                                      | -2.016484000 | 2.127912000  | 0.000375000  | 1                                                                    | -1.988653000 | 2.143051000  | -0.010279000 |
| 1                                                                      | -1.943753000 | -2.169760000 | -0.000255000 | 1                                                                    | -1.918468000 | -2.165454000 | -0.008745000 |
| 1                                                                      | 0.550180000  | -2.122867000 | -0.000322000 | 1                                                                    | 0.551209000  | -2.119626000 | -0.000417000 |
| 1                                                                      | 3.710393000  | -0.909024000 | -0.000224000 | 1                                                                    | 3.720246000  | -0.919761000 | 0.006462000  |
| 8                                                                      | -3.482755000 | -0.122401000 | 0.000094000  | 7                                                                    | -3.513550000 | -0.037154000 | -0.058328000 |
| 1                                                                      | -3.864039000 | 0.765839000  | 0.000230000  | 1                                                                    | -3.992174000 | 0.799448000  | 0.241543000  |
| p-NHCH <sub>3</sub> , E <sub>scf</sub> = -515.5065603                  |              |              |              | p-N(CH <sub>3</sub> ) <sub>2</sub> , E <sub>scf</sub> = -554.8128738 |              |              |              |
|                                                                        |              |              |              | 1                                                                    | -3.965175000 | -0.887944000 | 0.243421000  |

|                                                         |              |              |              |                                                         |              |              |              |
|---------------------------------------------------------|--------------|--------------|--------------|---------------------------------------------------------|--------------|--------------|--------------|
| 6                                                       | 0.534333000  | 1.311715000  | 0.002646000  | 6                                                       | -0.753368000 | -1.228706000 | -0.005116000 |
| 6                                                       | -0.841782000 | 1.434823000  | -0.014919000 | 6                                                       | 0.631109000  | -1.222658000 | -0.012404000 |
| 6                                                       | -1.669674000 | 0.287986000  | -0.041311000 | 6                                                       | 1.351855000  | -0.001258000 | -0.021877000 |
| 6                                                       | -1.055714000 | -0.982886000 | -0.044237000 | 6                                                       | 0.603100000  | 1.202585000  | -0.012403000 |
| 6                                                       | 0.328709000  | -1.093883000 | -0.029618000 | 6                                                       | -0.782863000 | 1.179986000  | -0.005182000 |
| 6                                                       | 1.145187000  | 0.045371000  | -0.005496000 | 6                                                       | -1.487267000 | -0.033316000 | -0.002771000 |
| 6                                                       | 2.617409000  | -0.025084000 | 0.014410000  | 6                                                       | -2.959061000 | -0.107087000 | 0.005433000  |
| 8                                                       | 3.096597000  | -1.301009000 | 0.003027000  | 8                                                       | -3.559736000 | 1.116692000  | 0.007362000  |
| 8                                                       | 3.369092000  | 0.933301000  | 0.038814000  | 8                                                       | -3.614859000 | -1.133865000 | 0.009803000  |
| 1                                                       | 1.168906000  | 2.191340000  | 0.023798000  | 1                                                       | -1.296796000 | -2.167783000 | 0.000803000  |
| 1                                                       | -1.300576000 | 2.420685000  | -0.012123000 | 1                                                       | 1.158439000  | -2.168150000 | -0.009941000 |
| 1                                                       | -1.662321000 | -1.881088000 | -0.058549000 | 1                                                       | 1.108771000  | 2.159840000  | -0.009973000 |
| 1                                                       | 0.786916000  | -2.076611000 | -0.032742000 | 1                                                       | -1.331980000 | 2.114987000  | 0.000636000  |
| 1                                                       | 4.063071000  | -1.208894000 | 0.017730000  | 1                                                       | -4.512814000 | 0.931201000  | 0.012624000  |
| 7                                                       | -3.037044000 | 0.437340000  | -0.086083000 | 7                                                       | 2.730558000  | 0.014654000  | -0.042104000 |
| 1                                                       | -3.385095000 | 1.360651000  | 0.119832000  | 6                                                       | 3.475552000  | -1.231808000 | 0.022511000  |
| 6                                                       | -3.967168000 | -0.658657000 | 0.089900000  | 1                                                       | 3.230630000  | -1.891148000 | -0.819516000 |
| 1                                                       | -3.834190000 | -1.184781000 | 1.046888000  | 1                                                       | 4.542818000  | -1.014199000 | -0.025705000 |
| 1                                                       | -4.984604000 | -0.264673000 | 0.052528000  | 1                                                       | 3.282925000  | -1.784965000 | 0.952656000  |
| 1                                                       | -3.866106000 | -1.392649000 | -0.717760000 | 6                                                       | 3.446623000  | 1.277695000  | 0.022933000  |
|                                                         |              |              |              | 1                                                       | 4.518671000  | 1.084582000  | -0.023432000 |
|                                                         |              |              |              | 1                                                       | 3.188096000  | 1.930884000  | -0.819936000 |
|                                                         |              |              |              | 1                                                       | 3.240025000  | 1.826952000  | 0.952453000  |
| <b>p-NHOH, E<sub>scf</sub> = -551.3524436</b>           |              |              |              | <b>p-NO<sub>2</sub>, E<sub>scf</sub> = -625.3324734</b> |              |              |              |
| 6                                                       | -0.275560000 | -1.139645000 | -0.088273000 | 6                                                       | -0.642209000 | 1.237511000  | -0.000130000 |
| 6                                                       | 1.105772000  | -1.006115000 | -0.132595000 | 6                                                       | 0.747856000  | 1.230011000  | -0.000218000 |
| 6                                                       | 1.682401000  | 0.275358000  | -0.102906000 | 6                                                       | 1.404525000  | 0.000471000  | -0.000074000 |
| 6                                                       | 0.851212000  | 1.410251000  | -0.033411000 | 6                                                       | 0.720522000  | -1.213240000 | 0.000146000  |
| 6                                                       | -0.526491000 | 1.263508000  | 0.003073000  | 6                                                       | -0.670974000 | -1.193044000 | 0.000221000  |
| 6                                                       | -1.108438000 | -0.014971000 | -0.019172000 | 6                                                       | -1.354692000 | 0.030719000  | 0.000086000  |
| 6                                                       | -2.571226000 | -0.225664000 | 0.029238000  | 6                                                       | -2.845124000 | 0.105682000  | 0.000177000  |
| 8                                                       | -3.277142000 | 0.936139000  | 0.089414000  | 8                                                       | -3.432976000 | -1.113559000 | 0.000181000  |
| 8                                                       | -3.124513000 | -1.309262000 | 0.018894000  | 8                                                       | -3.480409000 | 1.139267000  | 0.000054000  |
| 1                                                       | -0.735081000 | -2.122071000 | -0.109923000 | 1                                                       | -1.195909000 | 2.169542000  | -0.000225000 |
| 1                                                       | 1.746297000  | -1.876330000 | -0.207593000 | 1                                                       | 1.326999000  | 2.144317000  | -0.000394000 |
| 1                                                       | 1.294455000  | 2.402451000  | -0.011328000 | 1                                                       | 1.279867000  | -2.139802000 | 0.000254000  |
| 1                                                       | -1.162583000 | 2.139406000  | 0.058730000  | 1                                                       | -1.229451000 | -2.121320000 | 0.000380000  |
| 1                                                       | -4.210672000 | 0.669619000  | 0.115234000  | 1                                                       | -4.391184000 | -0.951886000 | 0.000145000  |
| 7                                                       | 3.063306000  | 0.450243000  | -0.198910000 | 7                                                       | 2.880581000  | -0.016886000 | -0.000159000 |
| 1                                                       | 3.414972000  | 1.300293000  | 0.232456000  | 8                                                       | 3.436970000  | -1.113829000 | -0.000008000 |
| 8                                                       | 3.859711000  | -0.646654000 | 0.178038000  | 8                                                       | 3.462189000  | 1.066708000  | -0.000263000 |
| 1                                                       | 3.598995000  | -0.883191000 | 1.088301000  |                                                         |              |              |              |
| <b>p-CF<sub>3</sub>, E<sub>scf</sub> = -757.8698076</b> |              |              |              | <b>p-CHO, E<sub>scf</sub> = -534.1577662</b>            |              |              |              |
| 6                                                       | -1.007128000 | -1.235852000 | -0.016464000 | 6                                                       | -0.410212000 | 1.299096000  | -0.000177000 |
| 6                                                       | 0.382866000  | -1.222586000 | -0.032459000 | 6                                                       | 0.977844000  | 1.380746000  | -0.000237000 |
| 6                                                       | 1.064163000  | -0.001332000 | -0.039968000 | 6                                                       | 1.751223000  | 0.212325000  | -0.000070000 |
| 6                                                       | 0.356791000  | 1.203465000  | -0.033197000 | 6                                                       | 1.125585000  | -1.043345000 | 0.000148000  |
| 6                                                       | -1.035241000 | 1.189808000  | -0.017643000 | 6                                                       | -0.260575000 | -1.129131000 | 0.000194000  |
| 6                                                       | -1.721663000 | -0.031090000 | -0.007770000 | 6                                                       | -1.032817000 | 0.044080000  | 0.000035000  |
| 6                                                       | -3.209481000 | -0.105007000 | 0.008408000  | 6                                                       | -2.523103000 | 0.011482000  | 0.000088000  |
| 8                                                       | -3.799586000 | 1.115162000  | 0.014885000  | 8                                                       | -3.025140000 | -1.247072000 | 0.000225000  |
| 8                                                       | -3.849594000 | -1.136580000 | 0.015818000  | 8                                                       | -3.234900000 | 0.995173000  | 0.000015000  |
| 1                                                       | -1.559674000 | -2.168752000 | -0.013120000 | 1                                                       | -1.031236000 | 2.187926000  | -0.000294000 |
| 1                                                       | 0.940500000  | -2.152429000 | -0.046714000 | 1                                                       | 1.468986000  | 2.350650000  | -0.000410000 |
| 1                                                       | 0.895130000  | 2.144357000  | -0.047811000 | 1                                                       | 1.747516000  | -1.932446000 | 0.000278000  |
| 1                                                       | -1.591756000 | 2.119469000  | -0.015605000 | 1                                                       | -0.754037000 | -2.093922000 | 0.000355000  |
| 1                                                       | -4.756706000 | 0.948475000  | 0.025876000  | 1                                                       | -3.991803000 | -1.149013000 | 0.000255000  |

|                                                      |              |              |              |                                                       |              |              |              |
|------------------------------------------------------|--------------|--------------|--------------|-------------------------------------------------------|--------------|--------------|--------------|
| 6                                                    | 2.570496000  | 0.012354000  | 0.003546000  | 6                                                     | 3.231992000  | 0.307674000  | -0.000121000 |
| 9                                                    | 3.099847000  | -1.045484000 | -0.648500000 | 8                                                     | 3.981455000  | -0.648993000 | -0.000160000 |
| 9                                                    | 3.080023000  | 1.132280000  | -0.553594000 | 1                                                     | 3.629634000  | 1.346387000  | 0.000015000  |
| 9                                                    | 3.026922000  | -0.039946000 | 1.275987000  |                                                       |              |              |              |
| p-CN, $E_{\text{scf}} = -513.0748827$                |              |              |              | p-COCH <sub>3</sub> , $E_{\text{scf}} = -573.4838249$ |              |              |              |
| 6                                                    | -0.248739000 | 1.234161000  | -0.000336000 | 6                                                     | 0.669019000  | 1.221679000  | -0.000104000 |
| 6                                                    | 1.139634000  | 1.223475000  | -0.000234000 | 6                                                     | -0.721077000 | 1.172309000  | -0.000119000 |
| 6                                                    | 1.826474000  | -0.003677000 | -0.000030000 | 6                                                     | -1.386810000 | -0.063195000 | -0.000063000 |
| 6                                                    | 1.110348000  | -1.213037000 | 0.000068000  | 6                                                     | -0.633806000 | -1.247522000 | 0.000054000  |
| 6                                                    | -0.279595000 | -1.193735000 | -0.000041000 | 6                                                     | 0.754663000  | -1.203306000 | 0.000062000  |
| 6                                                    | -0.963650000 | 0.029266000  | -0.000254000 | 6                                                     | 1.413106000  | 0.035597000  | -0.000017000 |
| 6                                                    | -2.452166000 | 0.105567000  | -0.000392000 | 6                                                     | 2.898267000  | 0.146882000  | 0.000009000  |
| 8                                                    | -3.041961000 | -1.113692000 | 0.000417000  | 8                                                     | 3.519635000  | -1.057872000 | 0.000168000  |
| 8                                                    | -3.087863000 | 1.139468000  | 0.000240000  | 8                                                     | 3.513814000  | 1.193965000  | -0.000116000 |
| 1                                                    | -0.801439000 | 2.166962000  | -0.000480000 | 1                                                     | 1.198834000  | 2.167848000  | -0.000142000 |
| 1                                                    | 1.700048000  | 2.151819000  | -0.000313000 | 1                                                     | -1.283645000 | 2.099801000  | -0.000160000 |
| 1                                                    | 1.648694000  | -2.154378000 | 0.000236000  | 1                                                     | -1.166339000 | -2.192187000 | 0.000125000  |
| 1                                                    | -0.838362000 | -2.121990000 | 0.000020000  | 1                                                     | 1.334837000  | -2.118742000 | 0.000143000  |
| 1                                                    | -3.999509000 | -0.948839000 | 0.000868000  | 1                                                     | 4.472020000  | -0.865809000 | 0.000148000  |
| 6                                                    | 3.261033000  | -0.022014000 | 0.000083000  | 6                                                     | -2.886296000 | -0.179244000 | -0.000041000 |
| 7                                                    | 4.424161000  | -0.037118000 | 0.000176000  | 8                                                     | -3.419008000 | -1.277712000 | -0.000280000 |
|                                                      |              |              |              | 6                                                     | -3.721085000 | 1.088406000  | 0.000306000  |
|                                                      |              |              |              | 1                                                     | -3.506032000 | 1.700852000  | -0.882171000 |
|                                                      |              |              |              | 1                                                     | -4.775235000 | 0.811043000  | 0.000366000  |
|                                                      |              |              |              | 1                                                     | -3.505864000 | 1.700514000  | 0.882990000  |
| p-CH <sub>2</sub> F, $E_{\text{scf}} = -559.3766323$ |              |              |              |                                                       |              |              |              |
| 6                                                    | -0.398409000 | 1.234357000  | -0.100903000 |                                                       |              |              |              |
| 6                                                    | 0.986011000  | 1.214568000  | -0.229598000 |                                                       |              |              |              |
| 6                                                    | 1.678542000  | -0.001003000 | -0.304231000 |                                                       |              |              |              |
| 6                                                    | 0.956643000  | -1.199271000 | -0.240555000 |                                                       |              |              |              |
| 6                                                    | -0.429380000 | -1.189900000 | -0.111443000 |                                                       |              |              |              |
| 6                                                    | -1.113311000 | 0.031150000  | -0.041435000 |                                                       |              |              |              |
| 6                                                    | -2.593188000 | 0.105641000  | 0.091744000  |                                                       |              |              |              |
| 8                                                    | -3.184656000 | -1.114571000 | 0.140176000  |                                                       |              |              |              |
| 8                                                    | -3.233457000 | 1.136146000  | 0.153231000  |                                                       |              |              |              |
| 1                                                    | 1.537548000  | 2.149713000  | -0.275062000 |                                                       |              |              |              |
| 1                                                    | 1.486097000  | -2.146676000 | -0.294648000 |                                                       |              |              |              |
| 1                                                    | -0.984662000 | -2.119467000 | -0.066167000 |                                                       |              |              |              |
| 1                                                    | -4.136727000 | -0.942601000 | 0.228022000  |                                                       |              |              |              |
| 1                                                    | -0.946729000 | 2.168385000  | -0.046175000 |                                                       |              |              |              |
| 6                                                    | 3.181613000  | -0.019458000 | -0.395685000 |                                                       |              |              |              |
| 1                                                    | 3.530405000  | -0.912071000 | -0.927258000 |                                                       |              |              |              |
| 1                                                    | 3.552687000  | 0.869376000  | -0.918388000 |                                                       |              |              |              |
| 9                                                    | 3.743905000  | -0.032861000 | 0.882782000  |                                                       |              |              |              |
